# Supplementary material
Source: publisher site journal article supplement (https://www.dovepress.com/article/365909)
Supplement: Supplementary file 1 [file get_supplementary_file.php]

**Tackling Microbial Resistance with Isatin-Decorated Thiazole Derivatives: Design, Synthesis, and in vitro Evaluation of Antimicrobial and Antibiofilm activity**

Refaie M. Kassab, Sami A. Al-Hussain, Nooran S. Elleboudy, Amgad Albohy, Magdi E. A. Zaki, Khaled AM Abouzid, Zeinab A. Muhammad


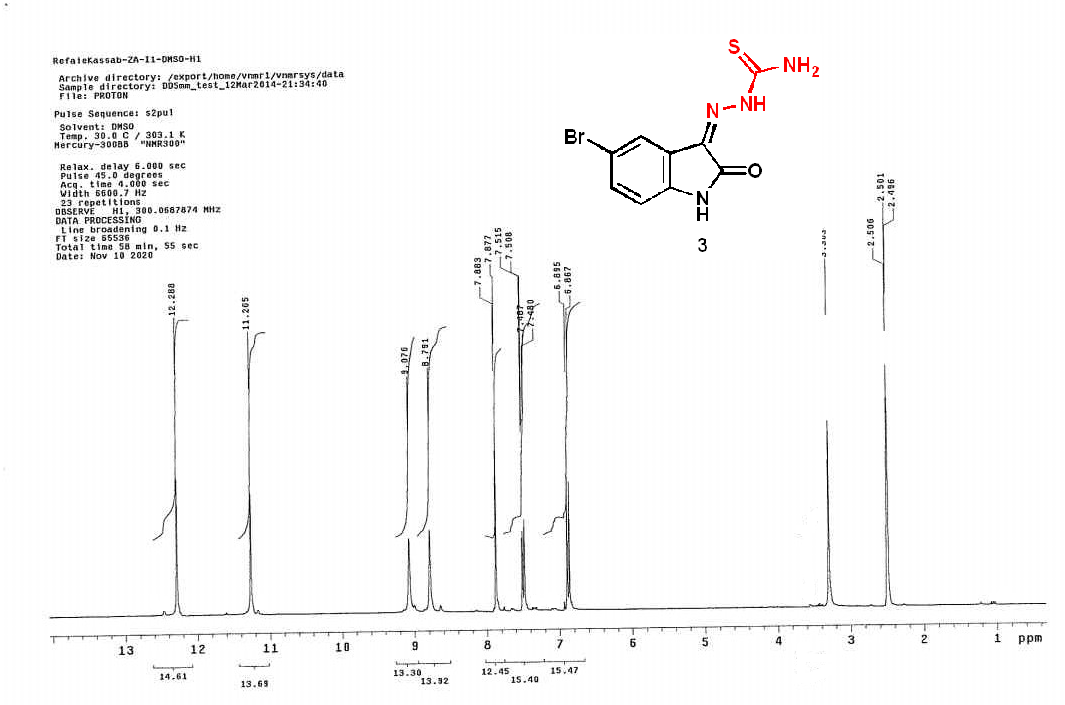


**1H NMR spectrum compound 3**


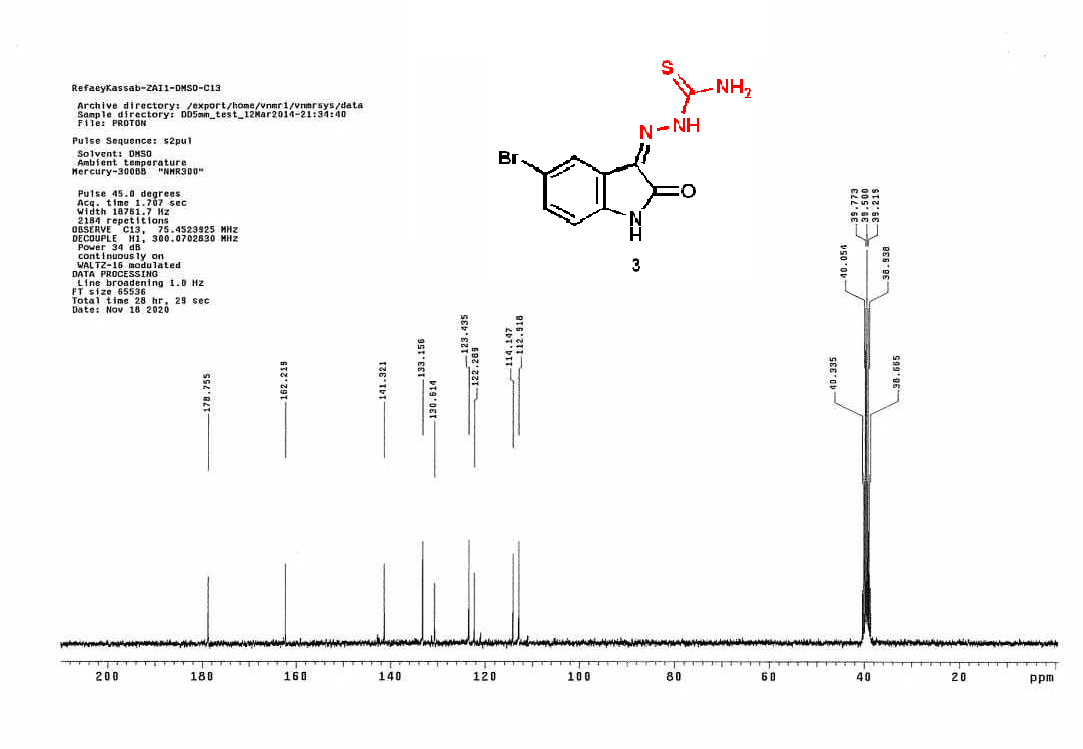


**1H NMR spectrum compound 3**


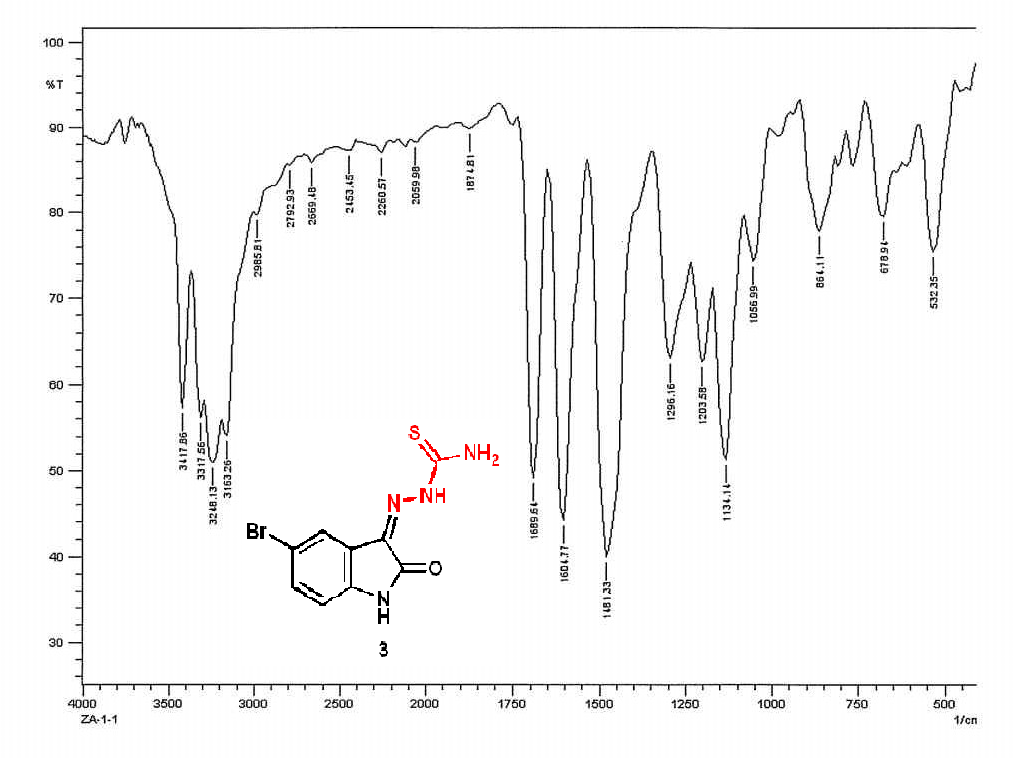


**IR spectrum compound 3**


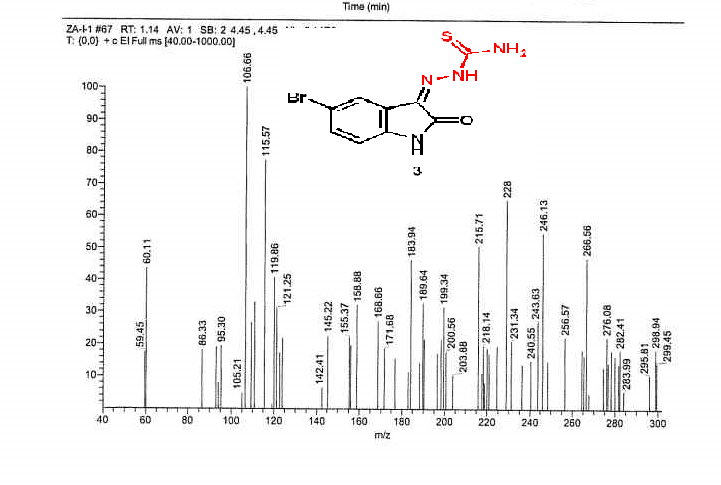


**Mass spectrum compound 3**


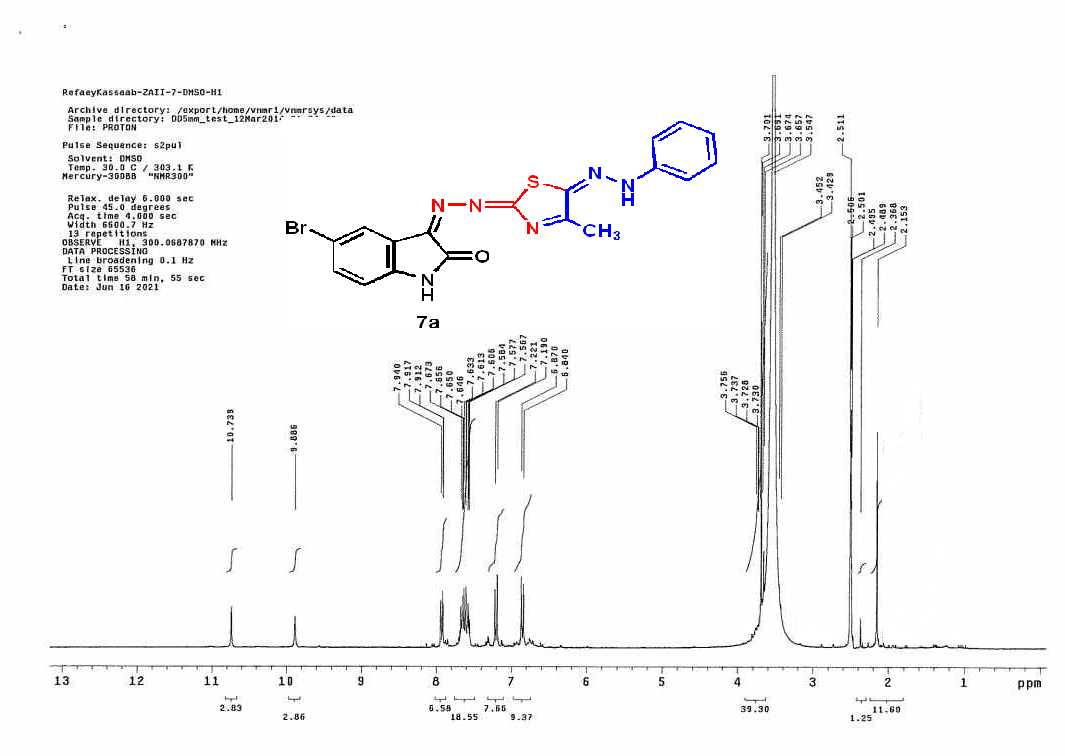


**1H NMR spectrum compound 7a**


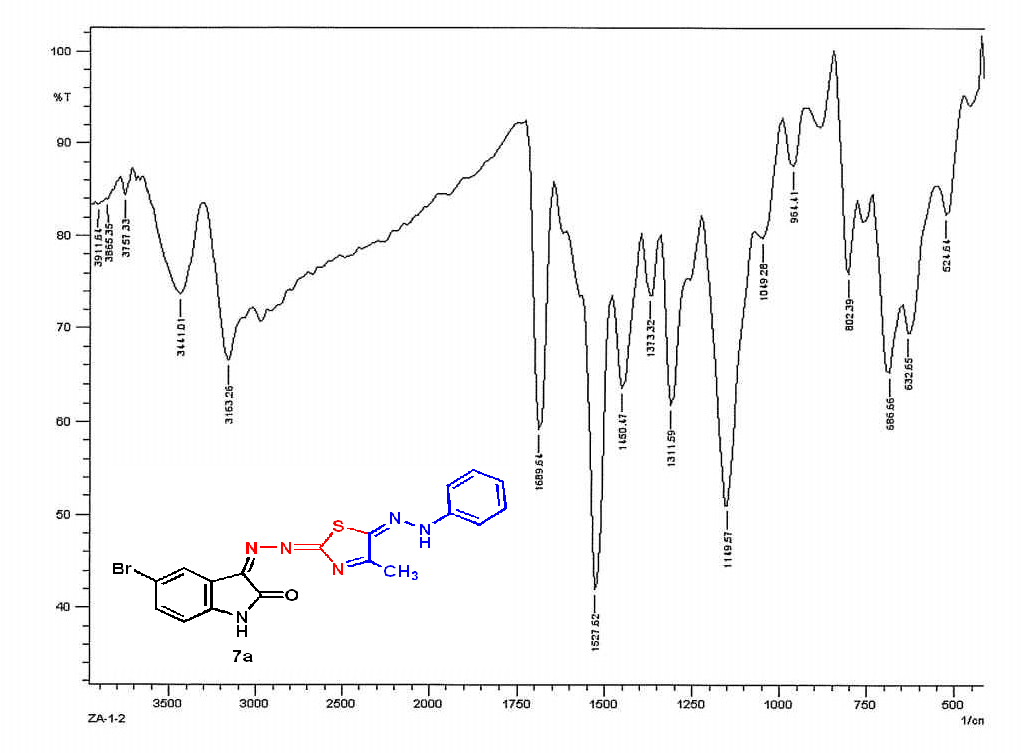


**IR spectrum compound 7a**


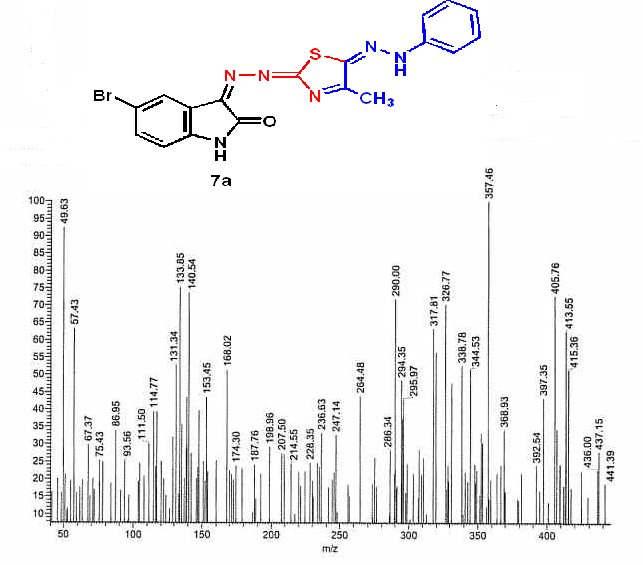


**Mass spectrum compound 7a**


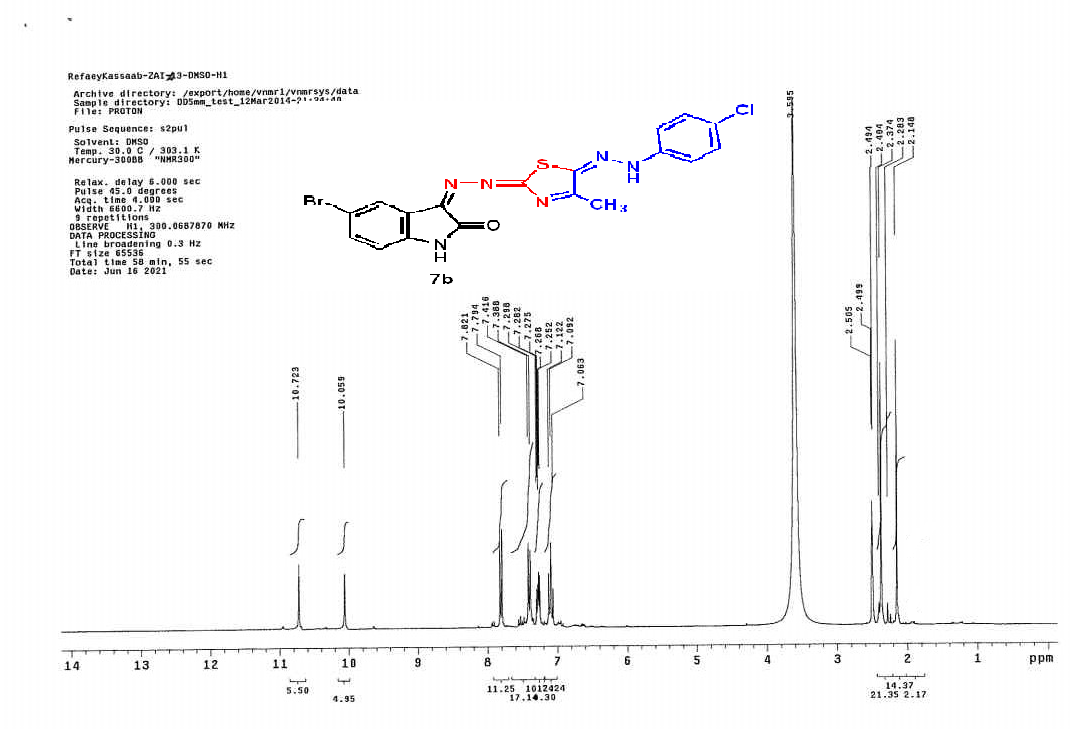


**1H NMR spectrum compound 7b**


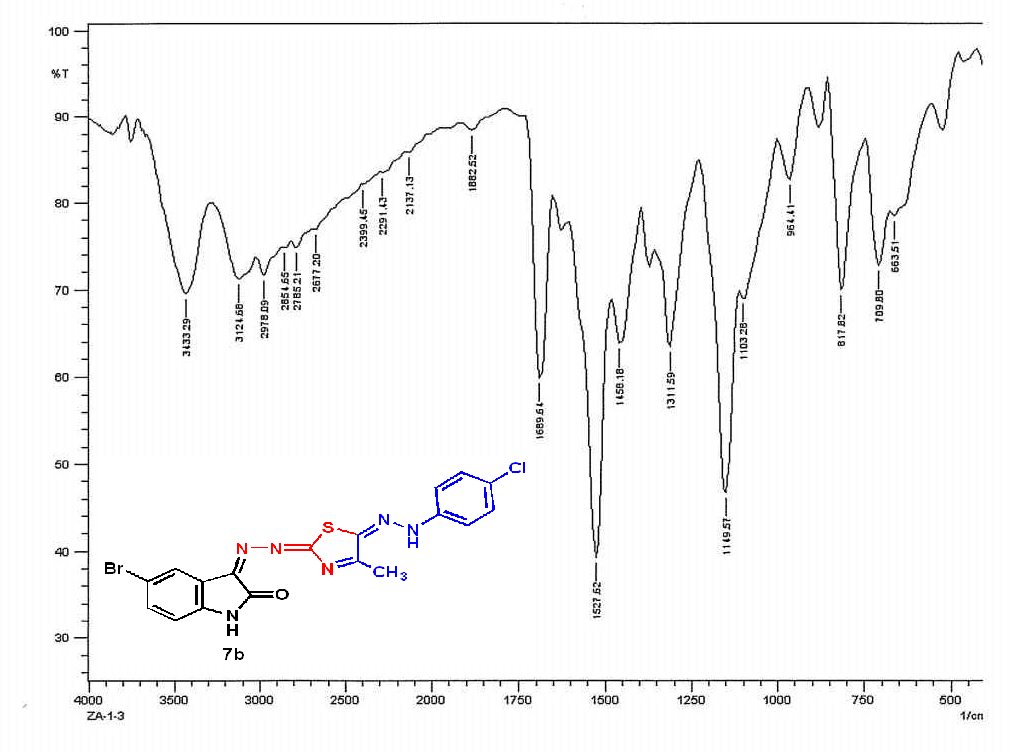


**IR spectrum compound 7b**


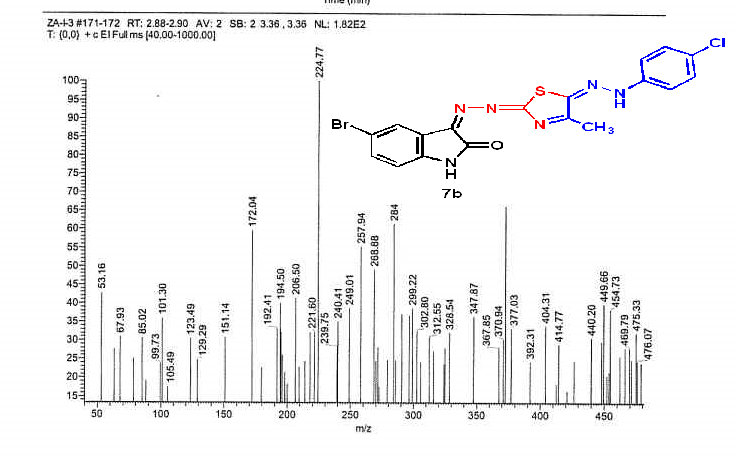


**Mass spectrum compound 7b**


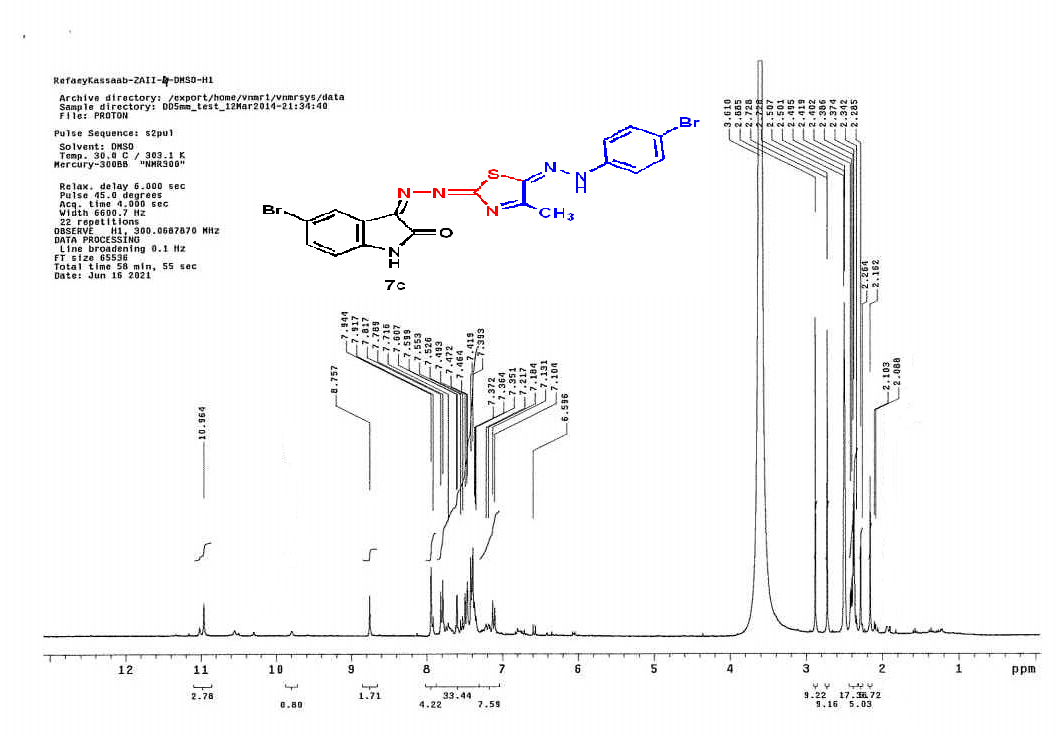


**1H NMR spectrum compound 7c**


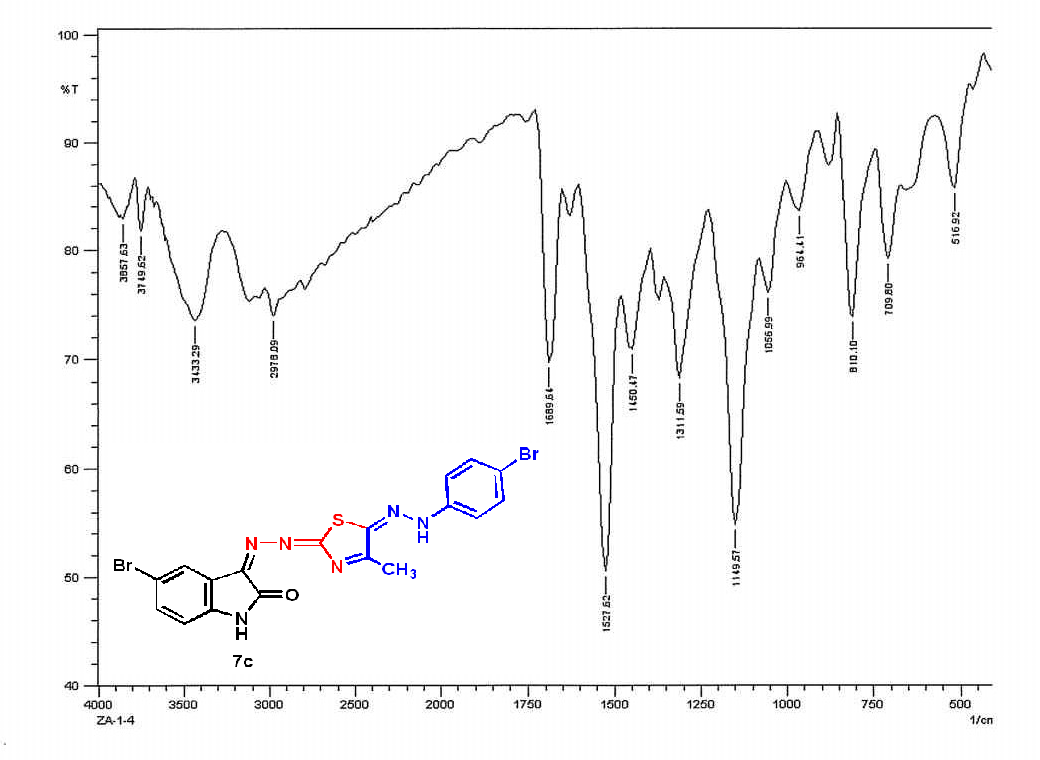


**IR spectrum compound 7c**


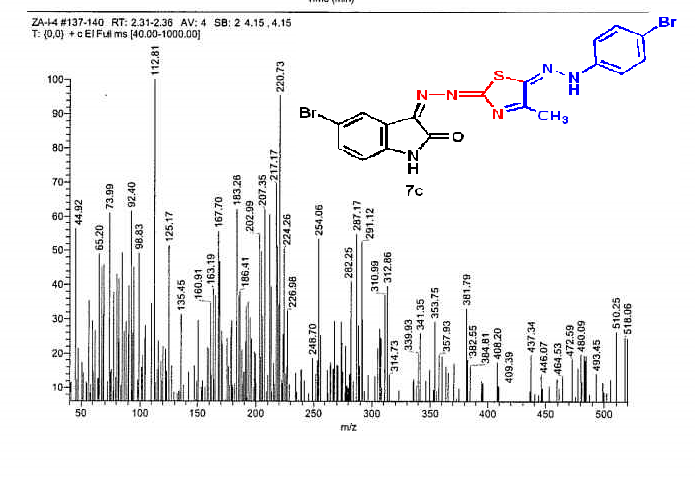


**Mass spectrum compound 7c**


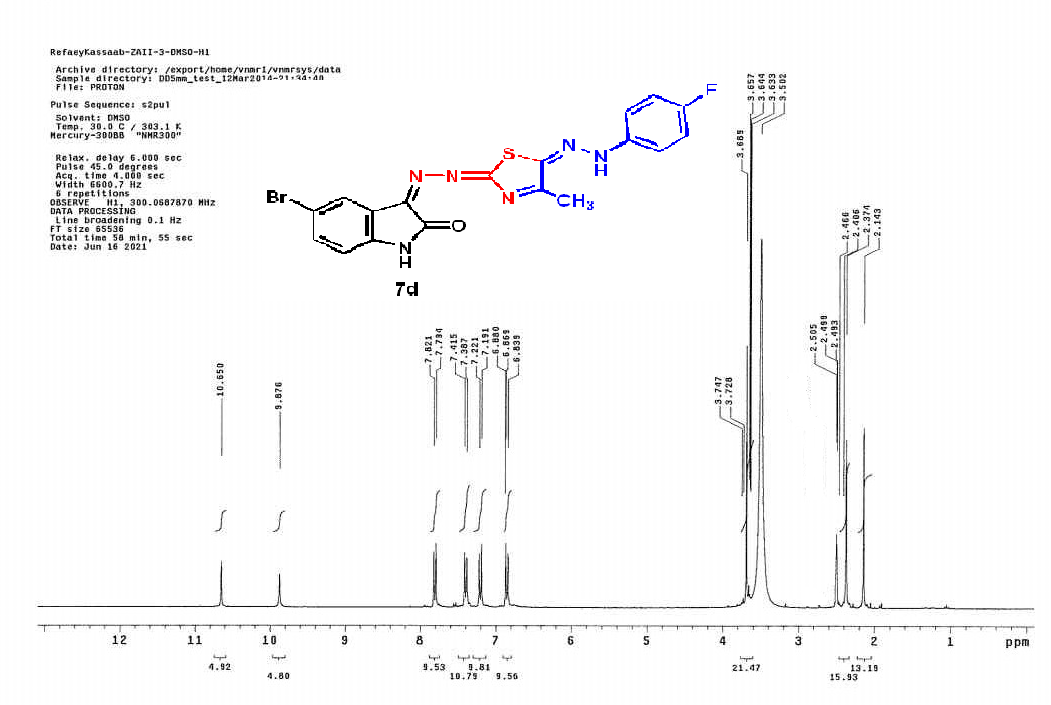


**1H NMR spectrum compound 7d**


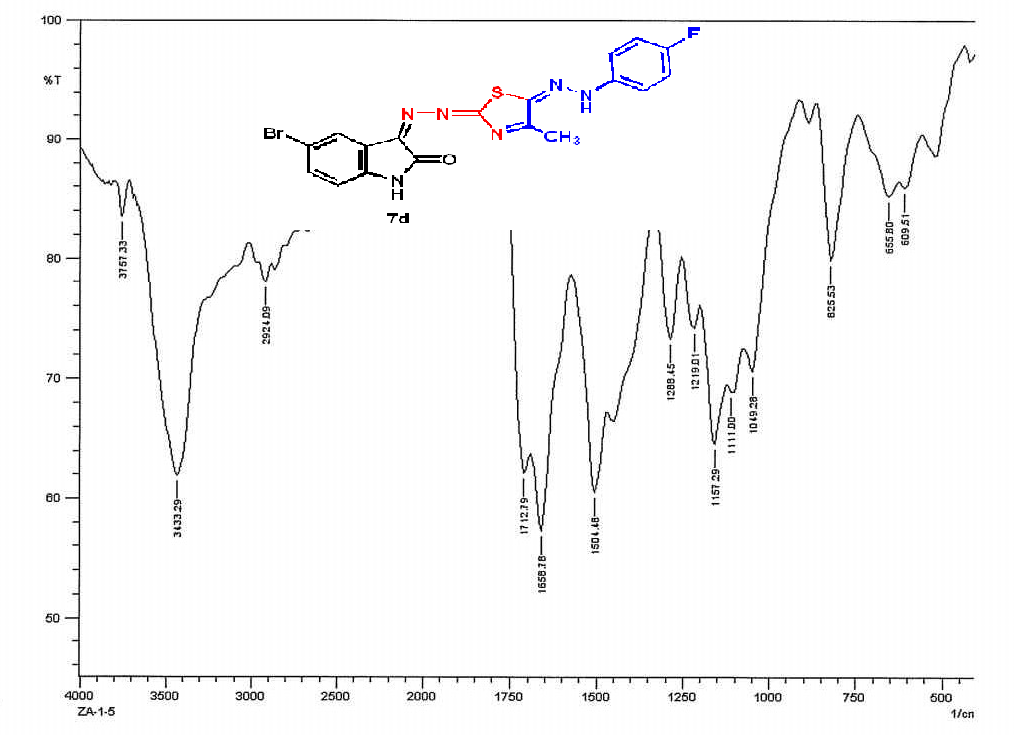


**IR spectrum compound 7d**


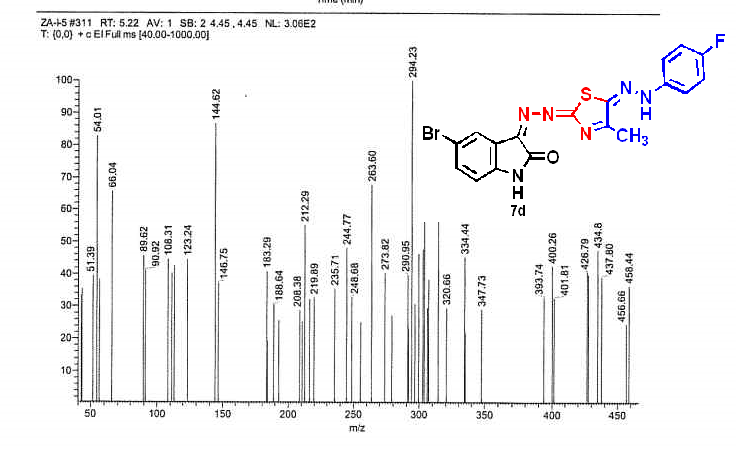


**Mass spectrum compound 7d**


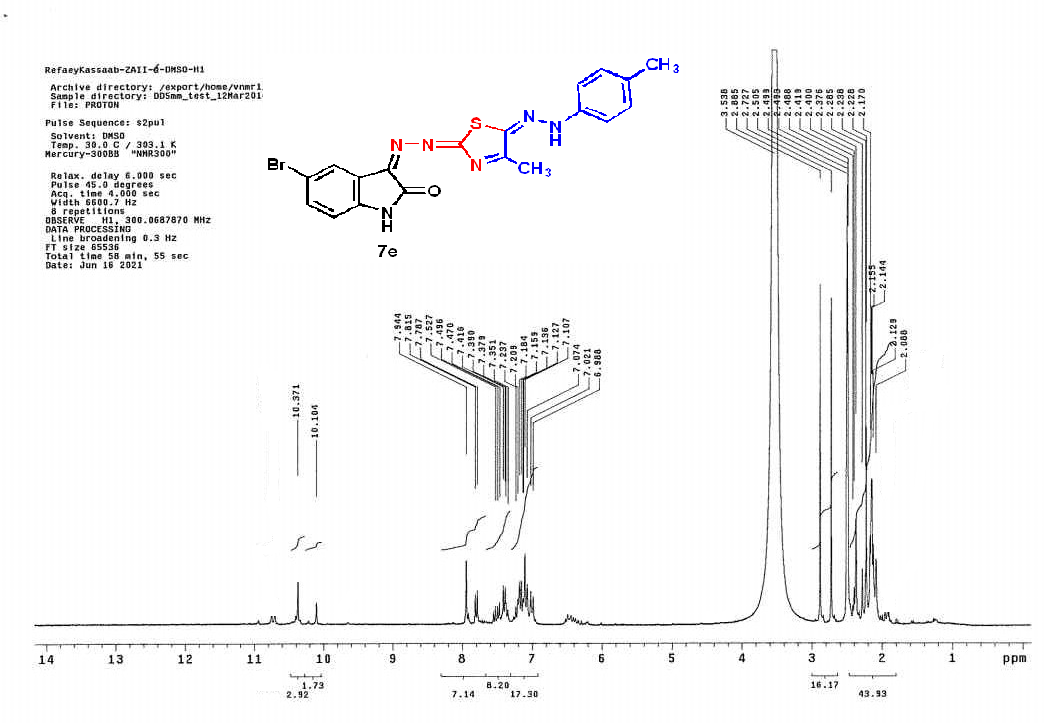


**1H NMR spectrum compound 7e**


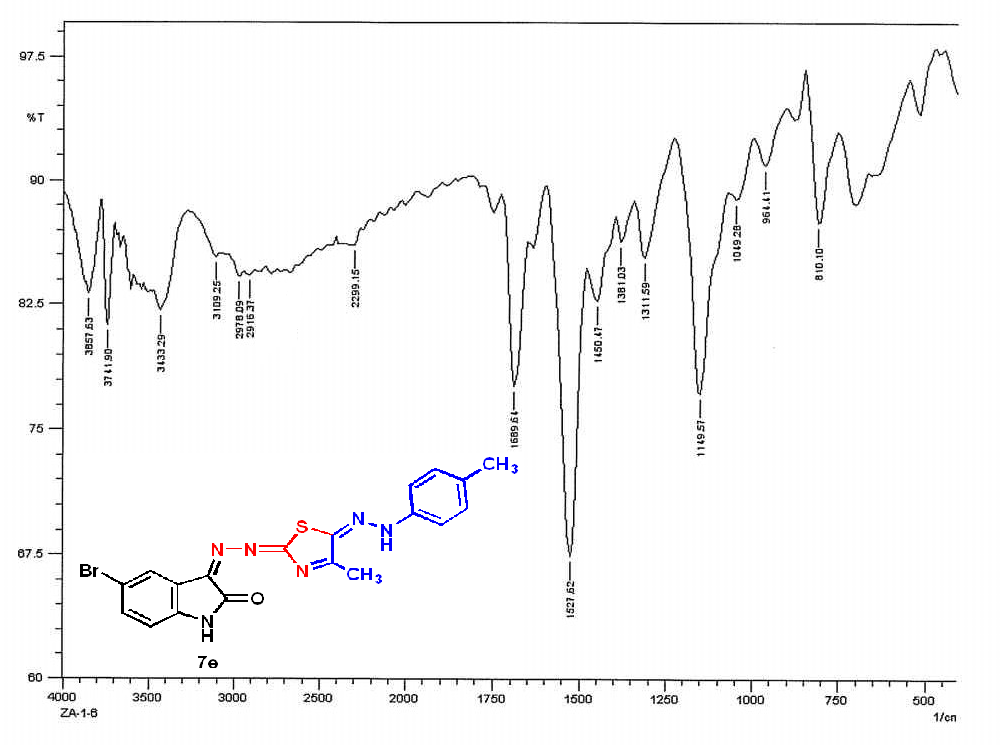


**IR spectrum compound 7e**


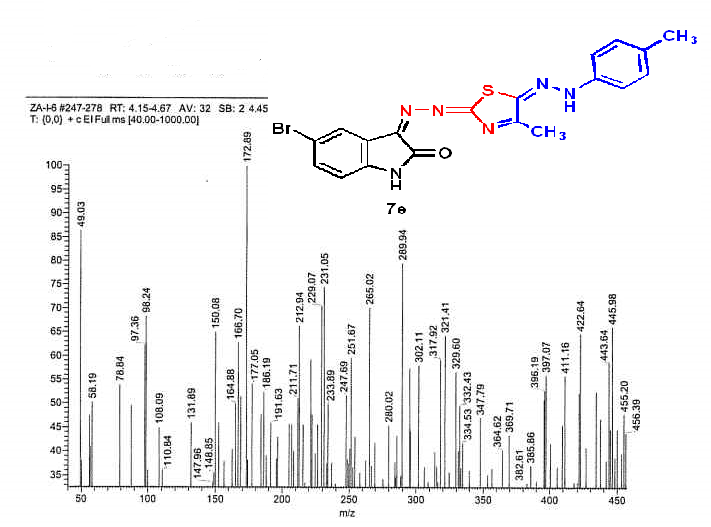


**Mass spectrum compound 7e**


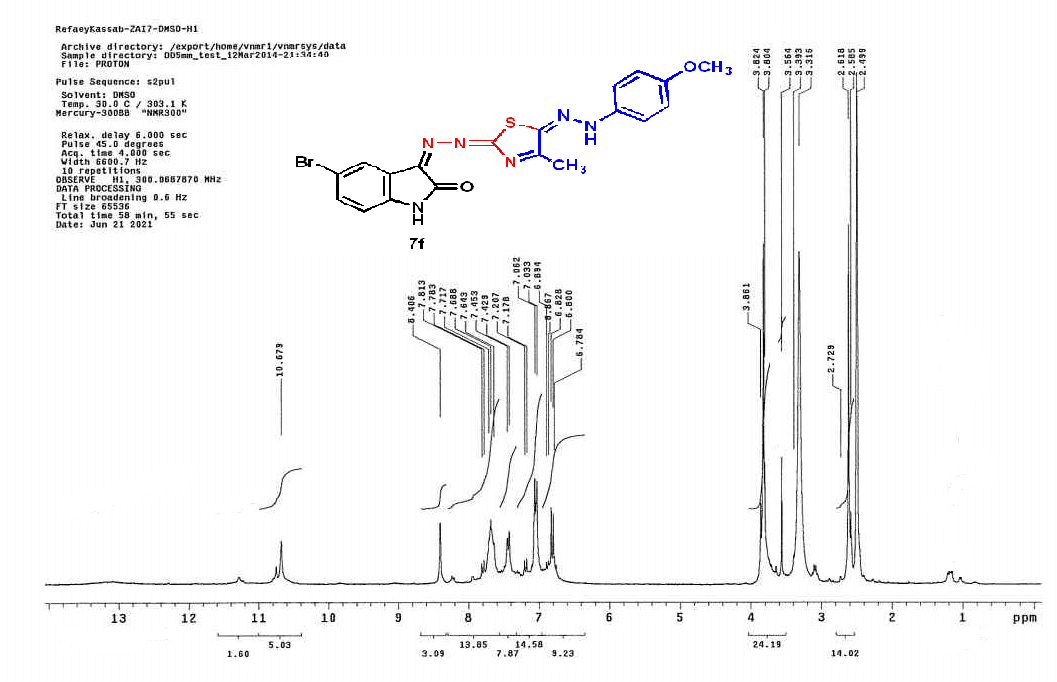


**1H NMR spectrum compound 7f**


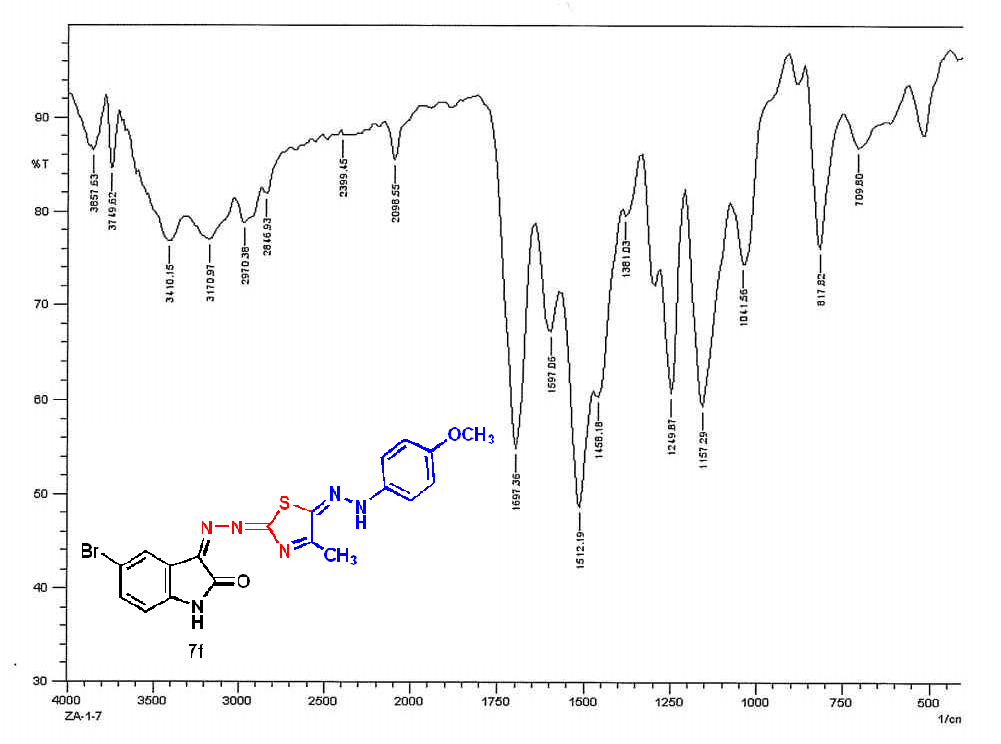


**IR spectrum compound 7f**


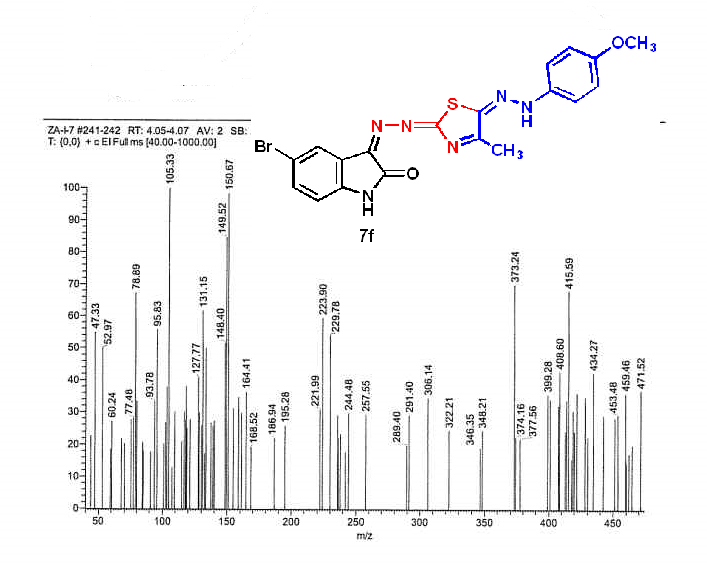


**Mass spectrum compound 7f**


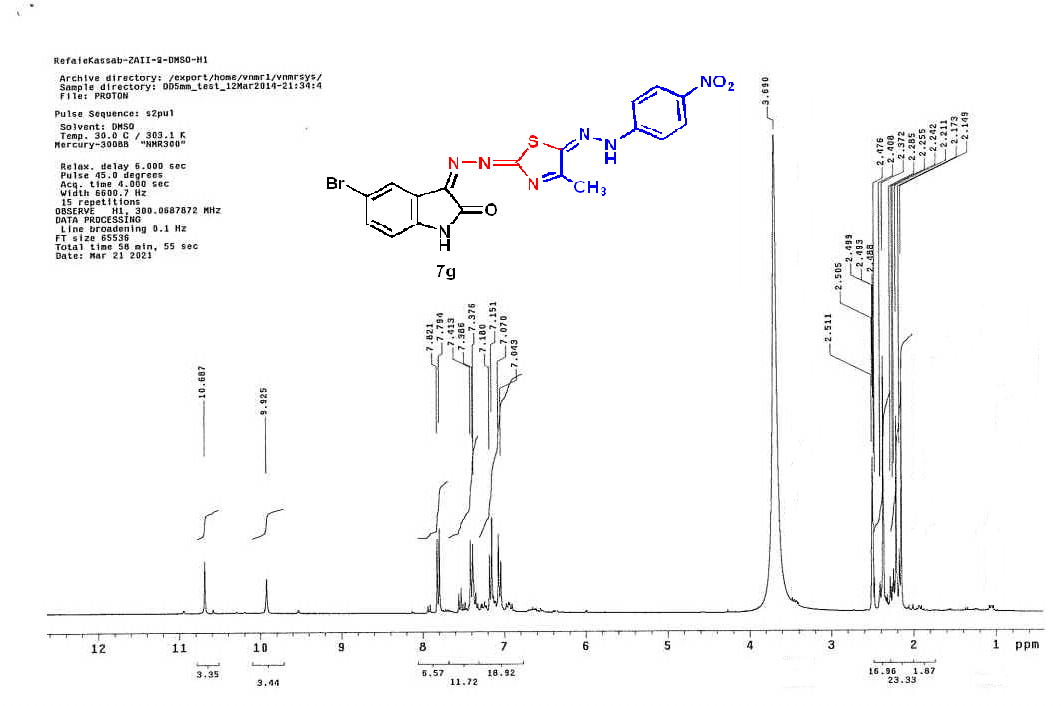


**1H NMR spectrum compound 7g**


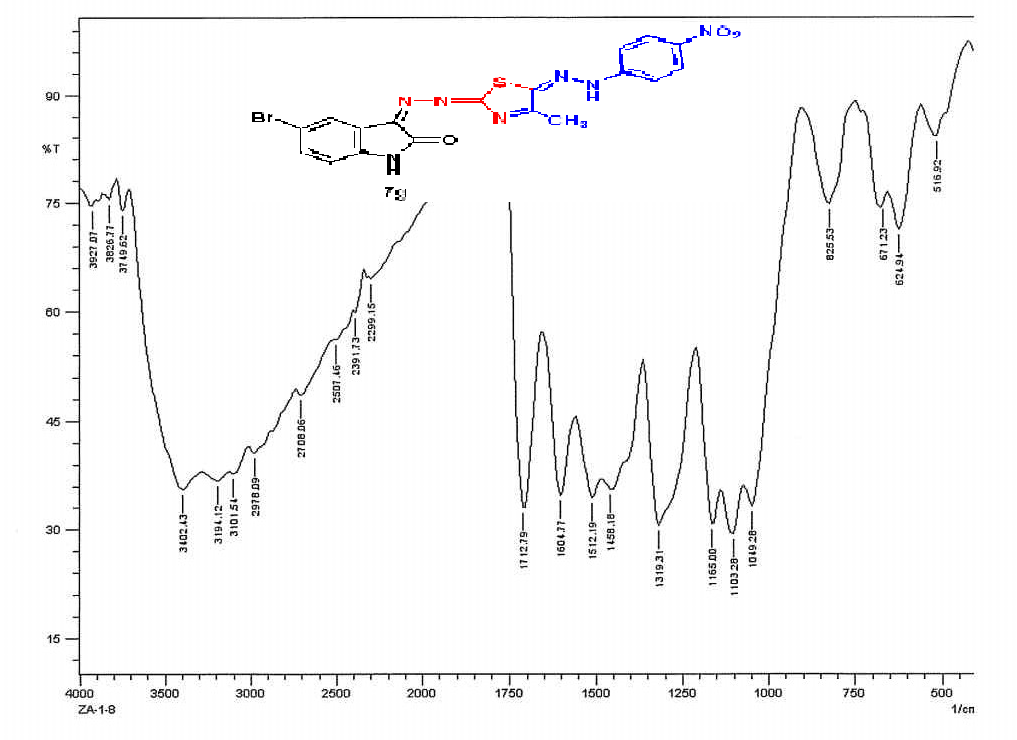


**IR spectrum compound 7g**


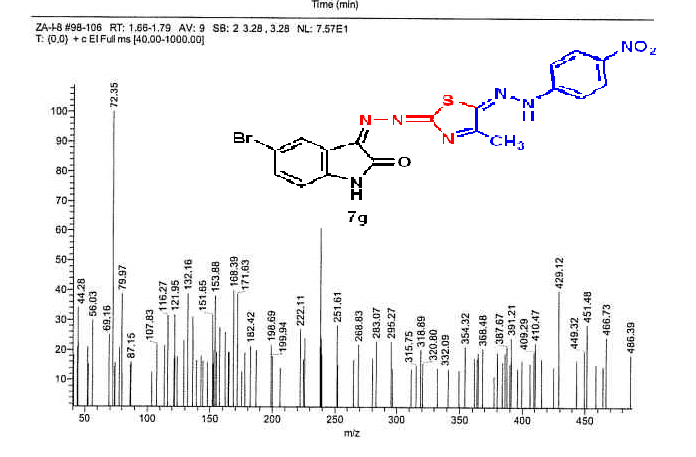


**Mass spectrum compound 7g**


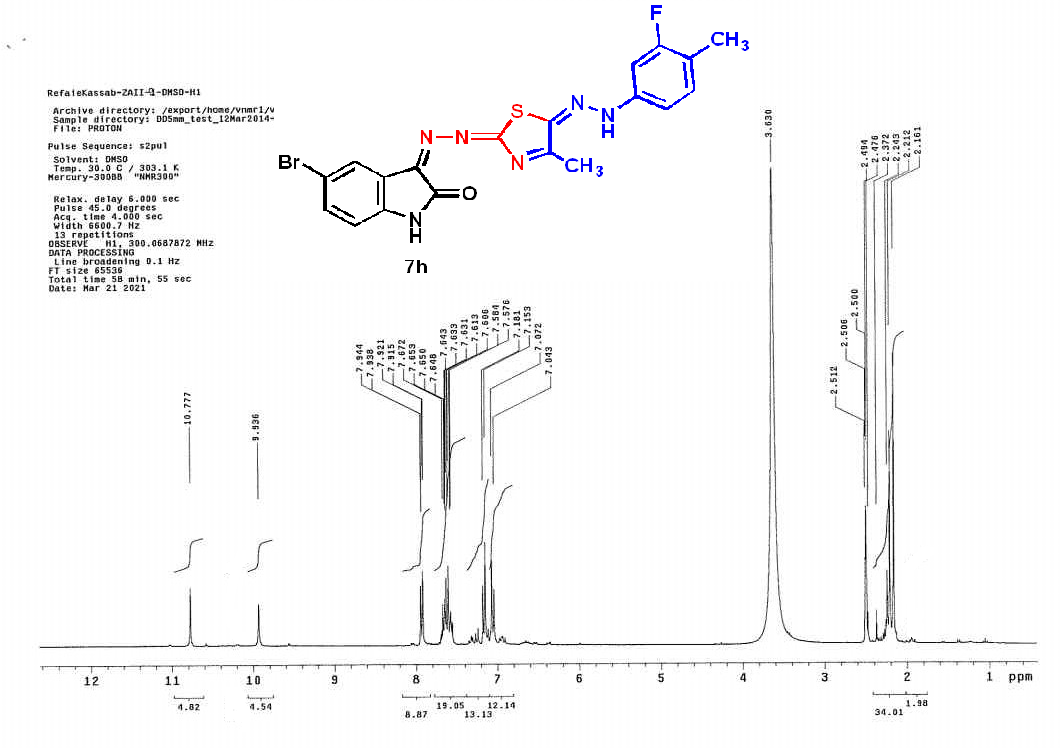


**1H NMR spectrum compound 7h**


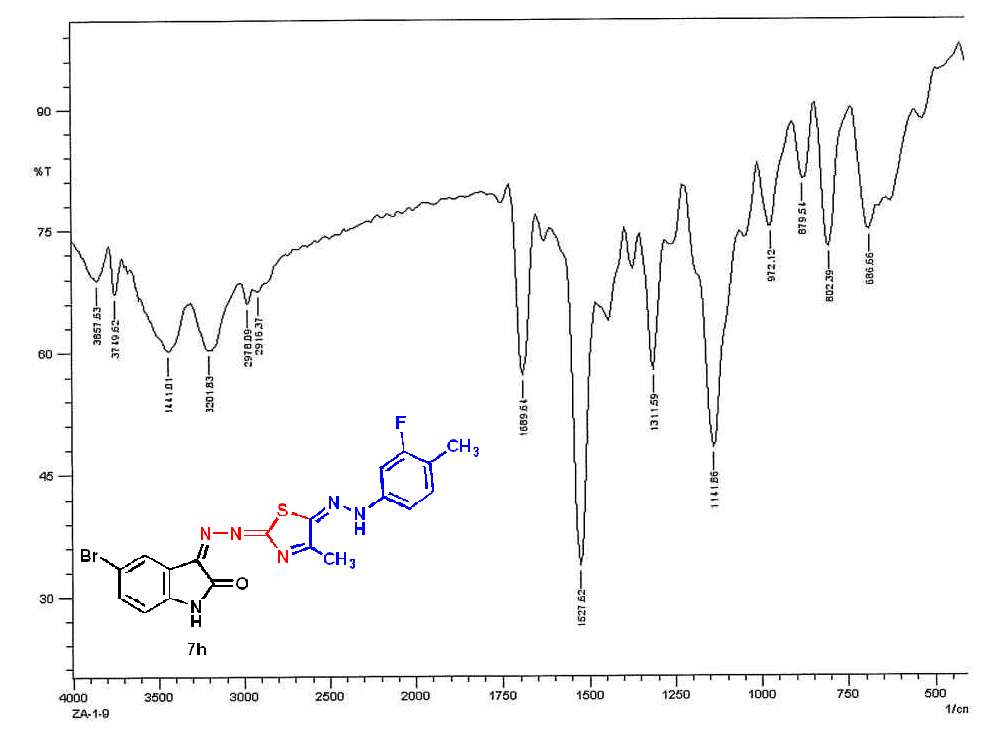


**IR spectrum compound 7h**


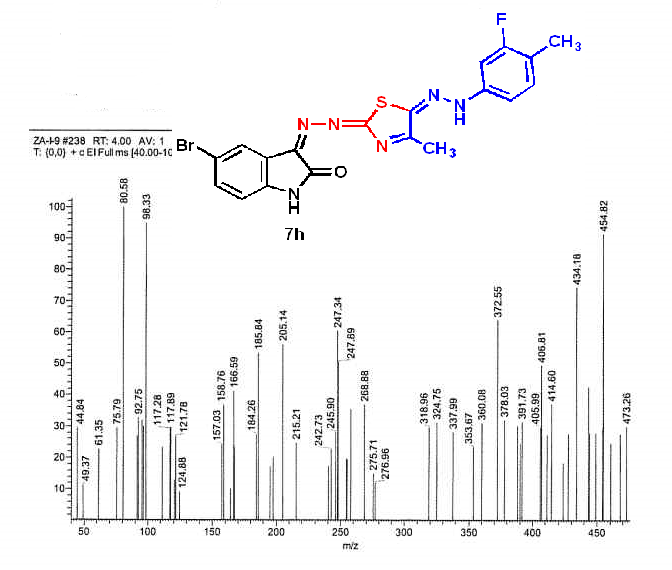


**Mass spectrum compound 7h**


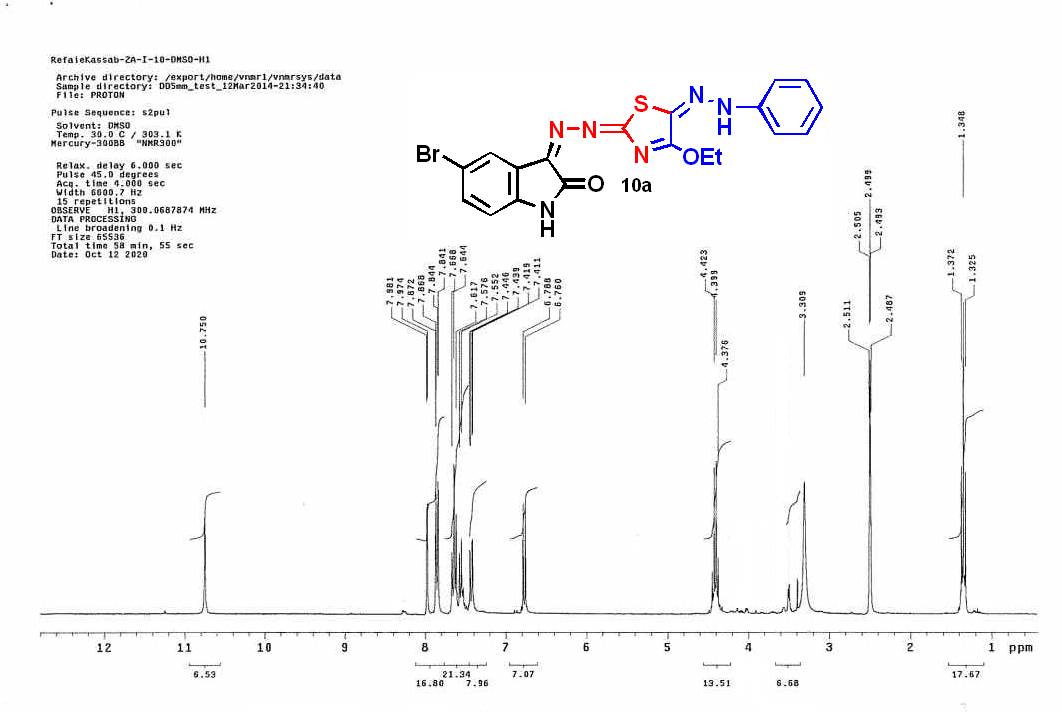


**1H NMR spectrum compound 11a**


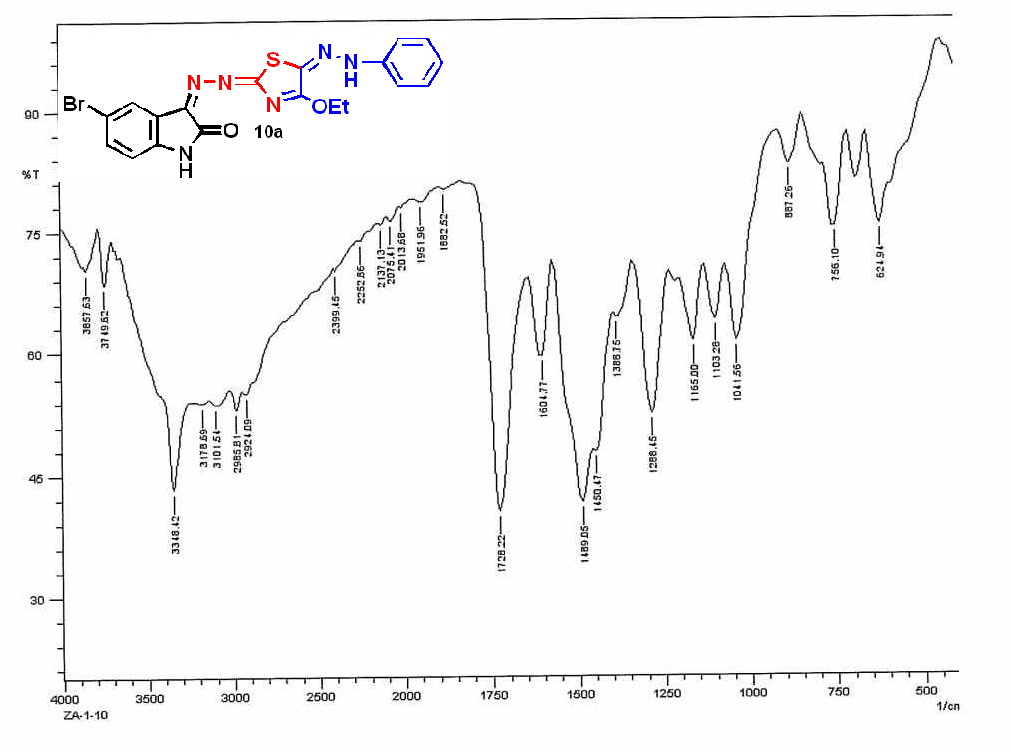


**IR spectrum compound 11a**


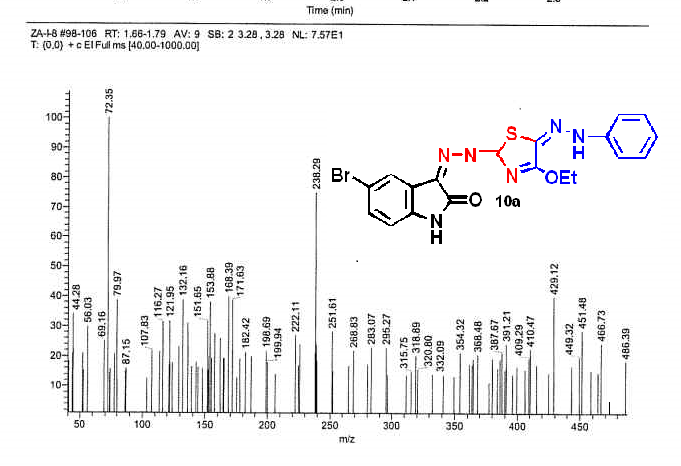


**Mass spectrum compound 11a**


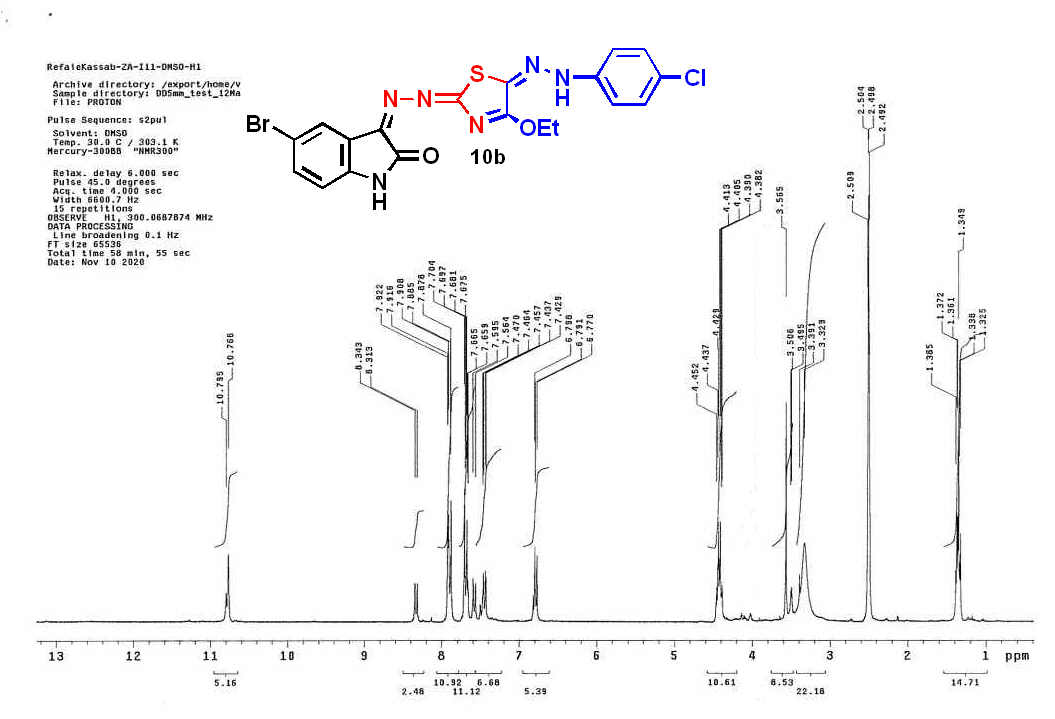


**1H NMR spectrum compound 11b**


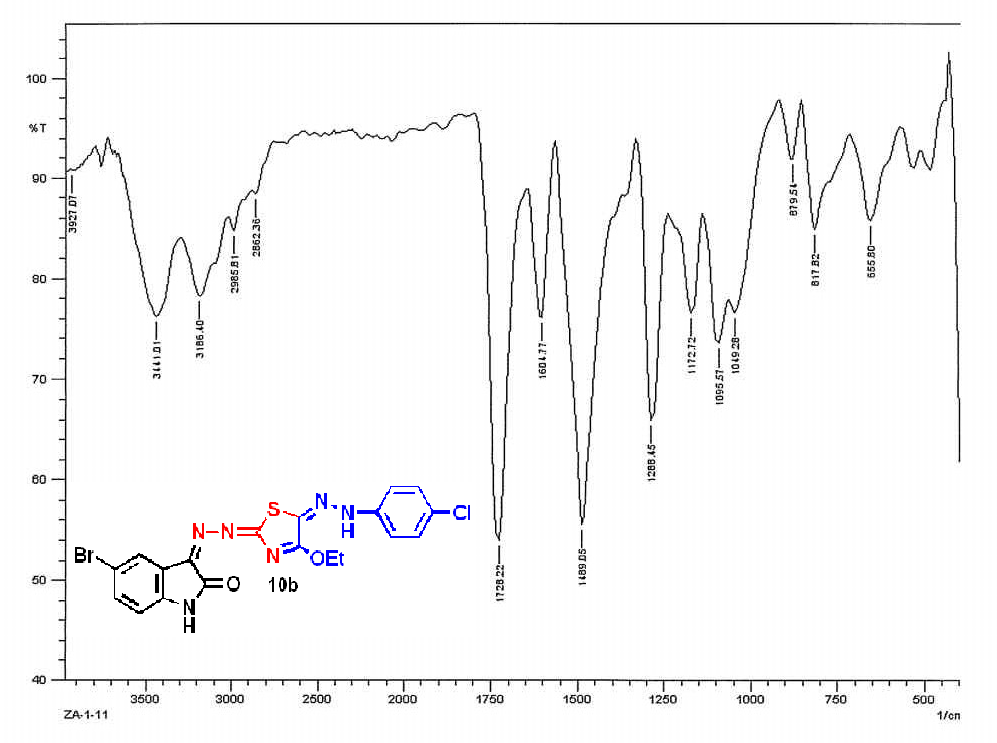


**IR spectrum compound 11b**


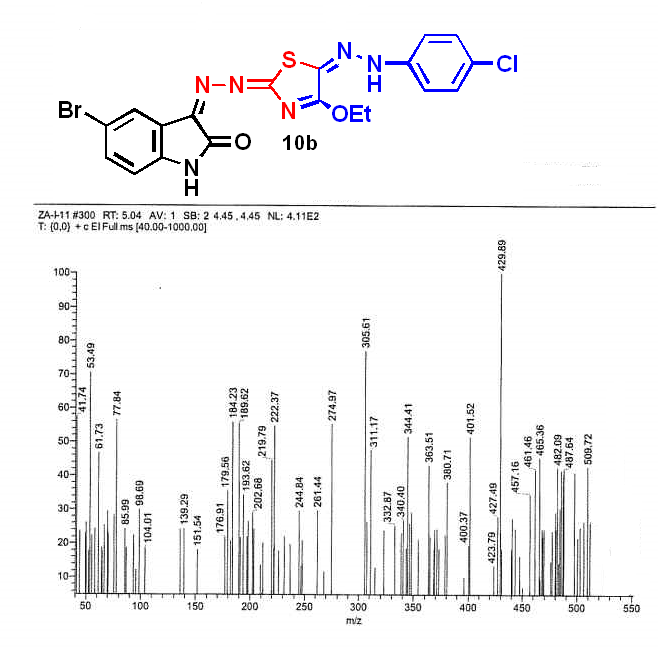


**Mass spectrum compound 11b**


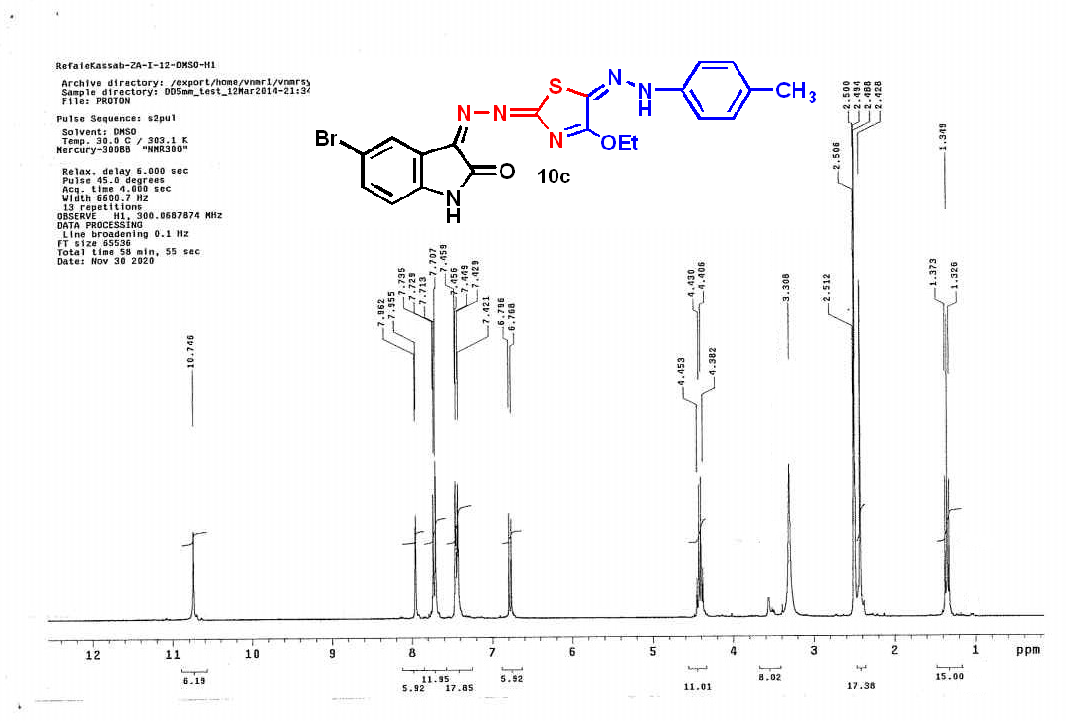


**1H NMR spectrum compound 11c**


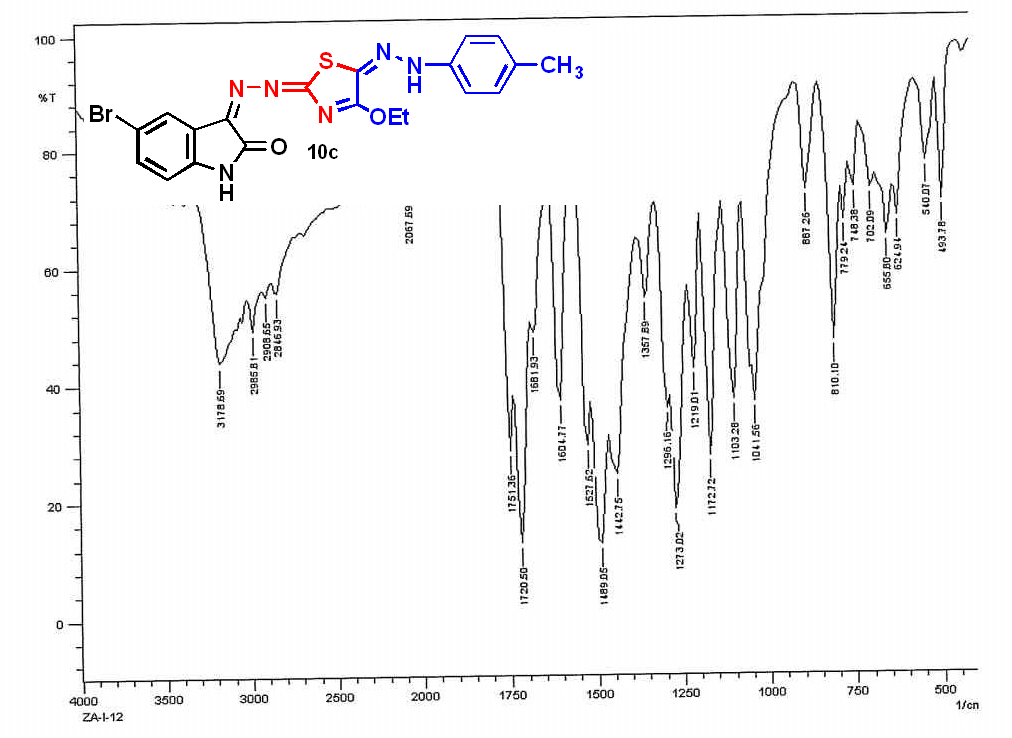


**IR spectrum compound 11c**


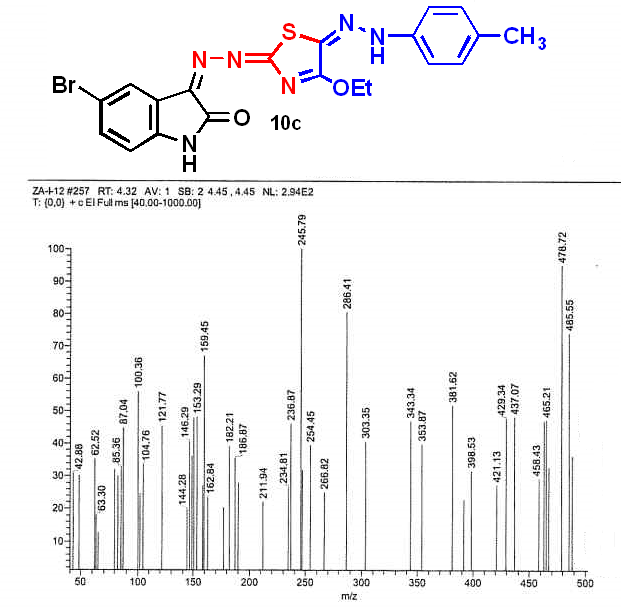


**Mass spectrum compound 11c**


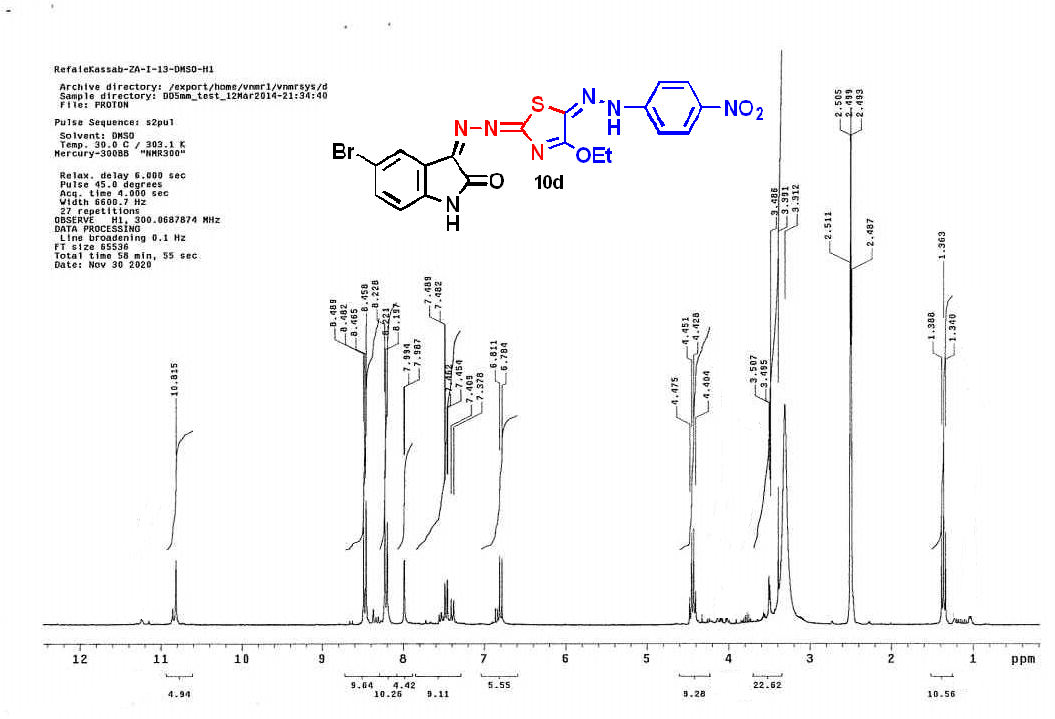


**1H NMR spectrum compound 11d**


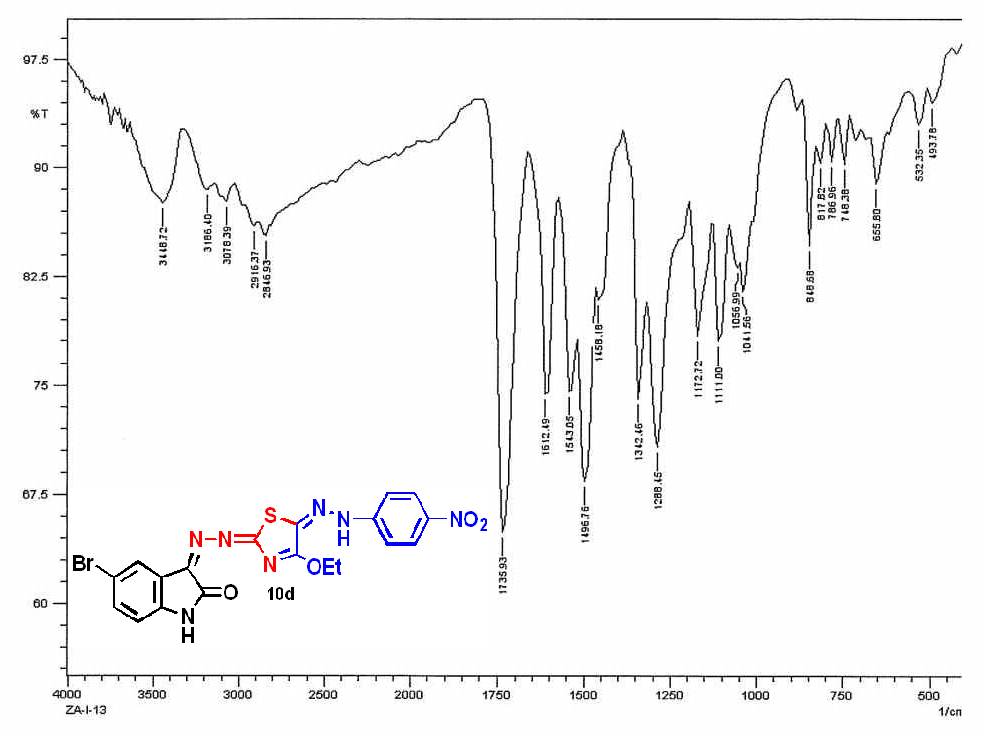


**IR spectrum compound 11d**


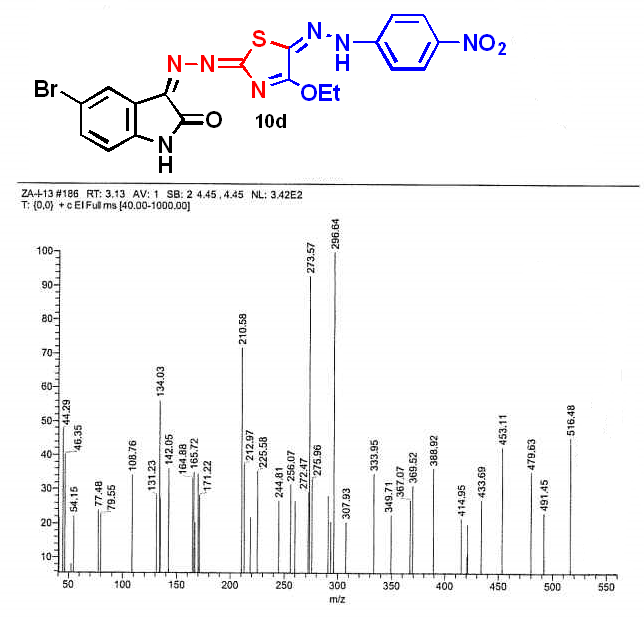


**Mass spectrum compound 11d**


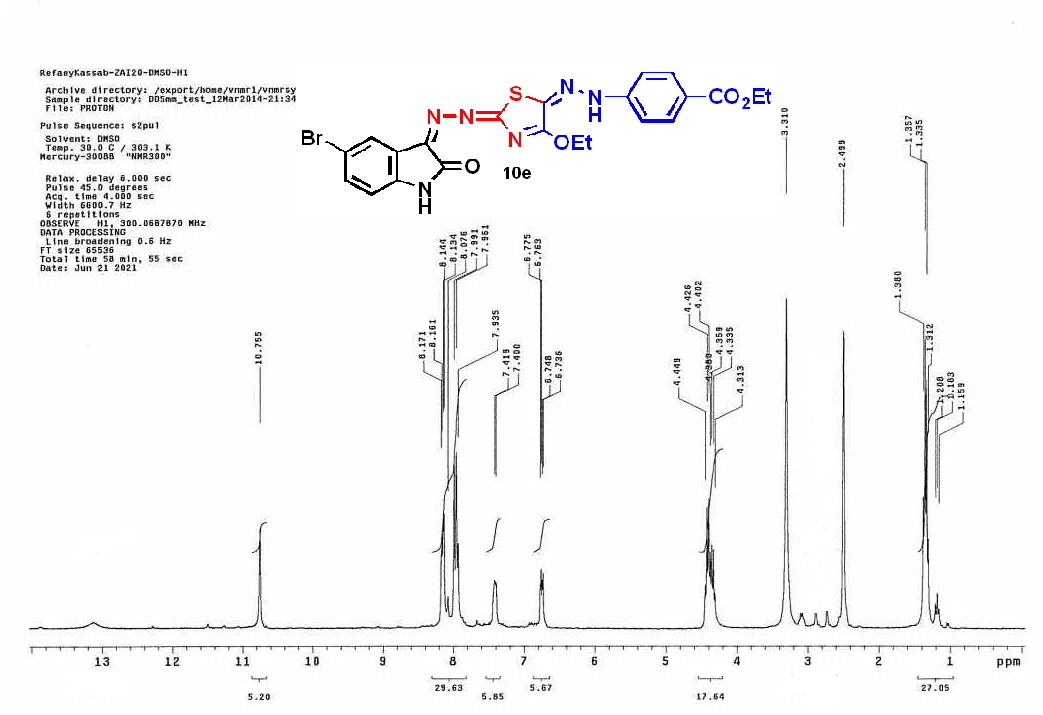


**1H NMR spectrum compound 11e**


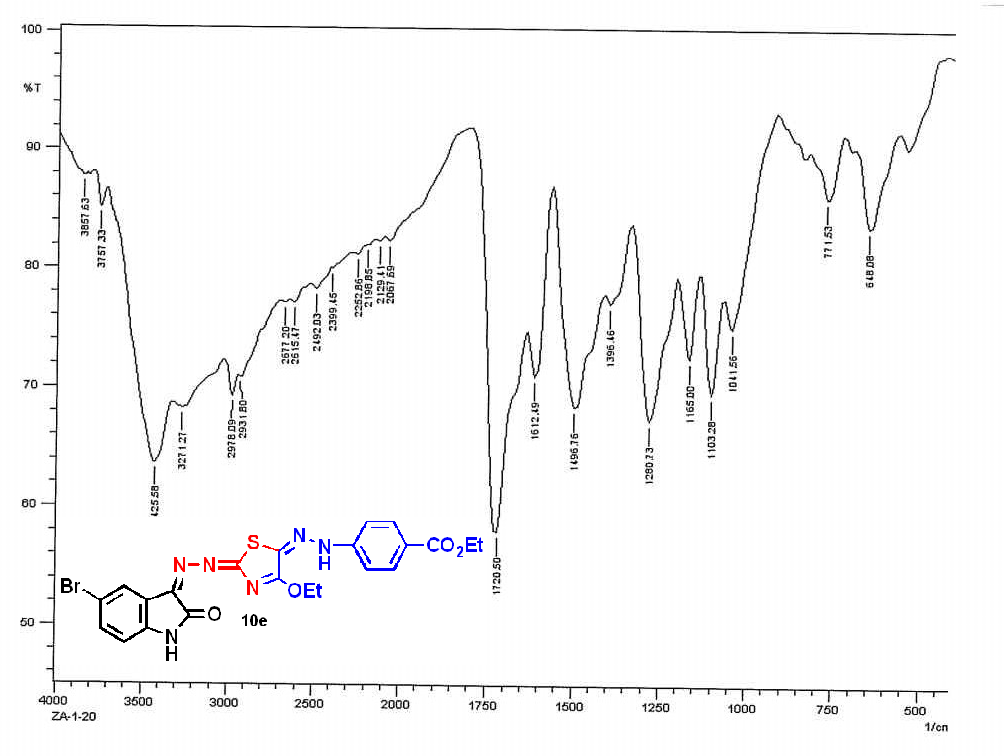


**IR spectrum compound 11e**


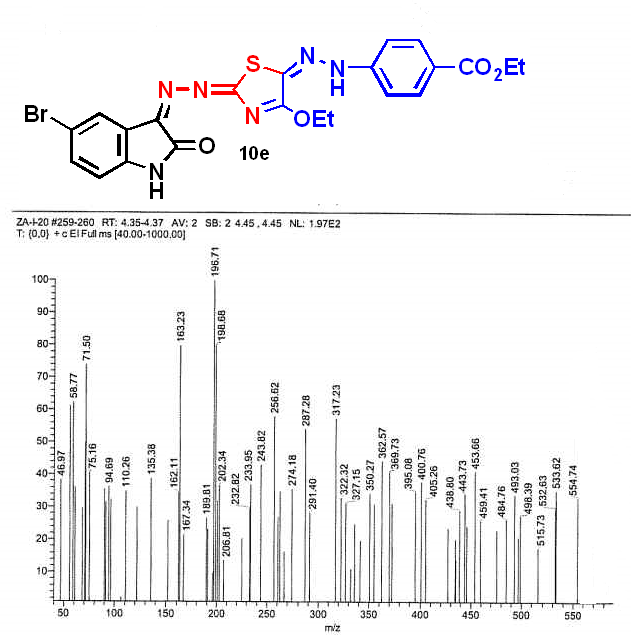


**Mass spectrum compound 11e**


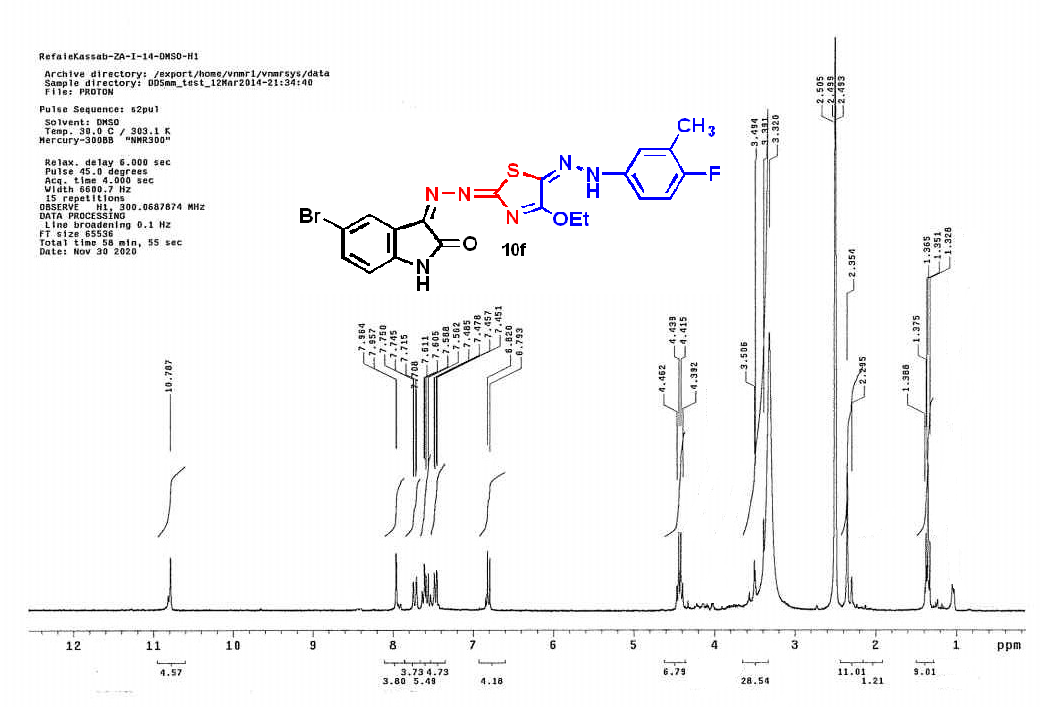


**1H NMR spectrum compound 11f**


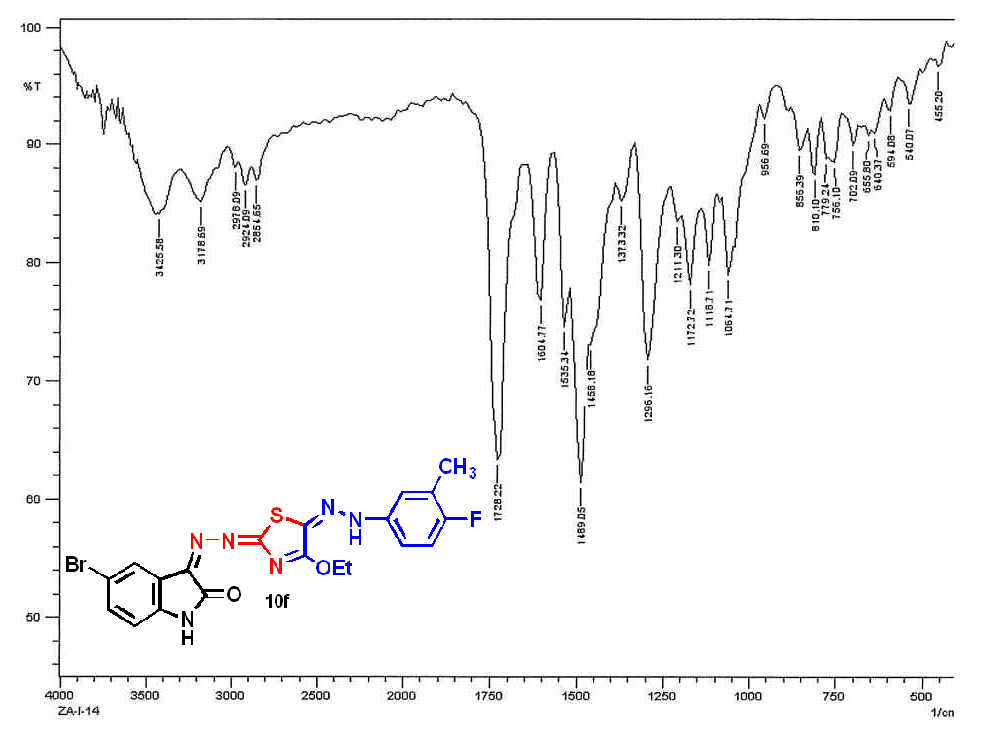


**IR spectrum compound 11f**


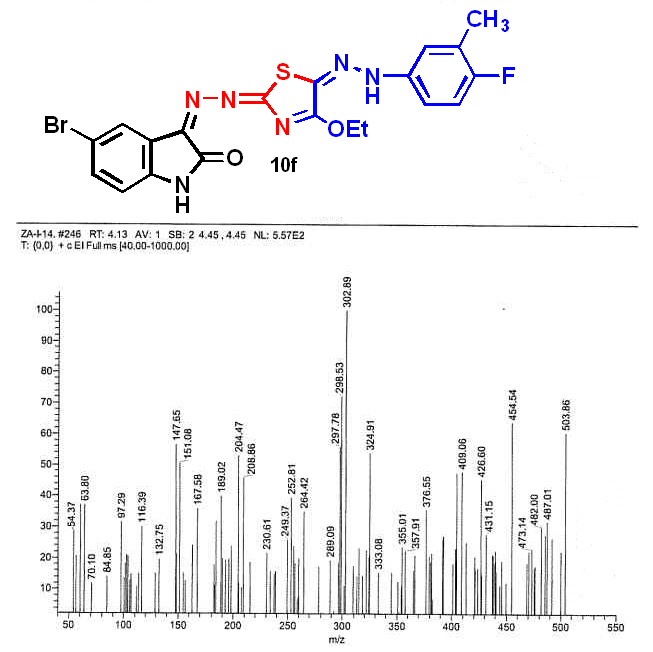


**Mass spectrum compound 11f**


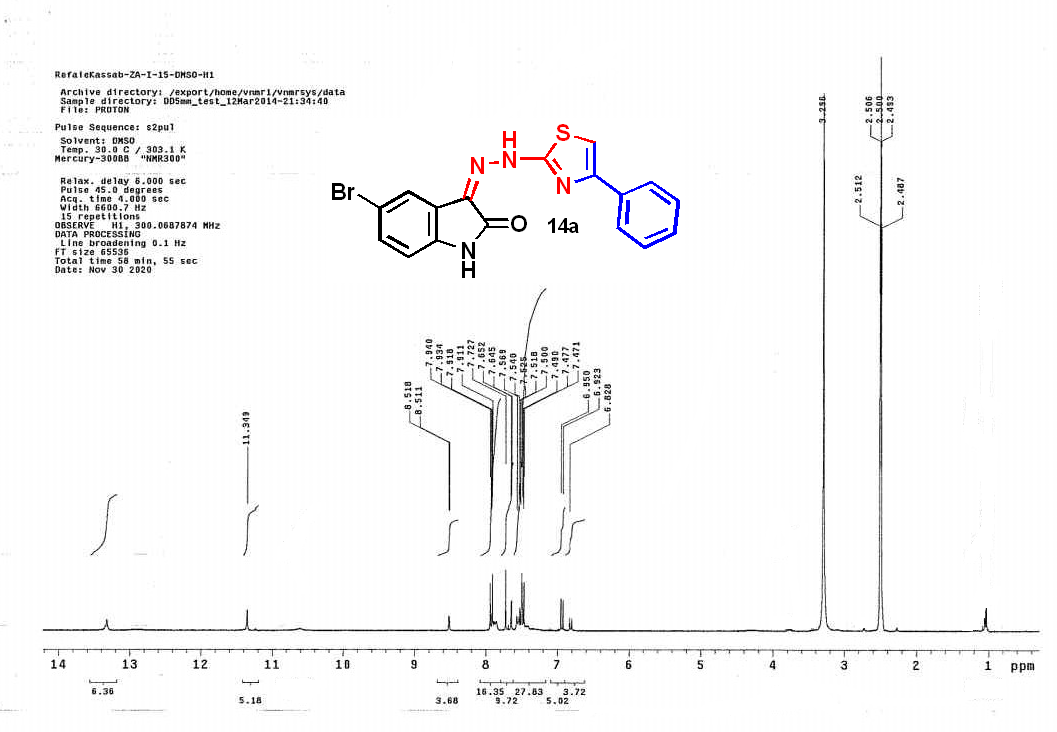


**1H NMR spectrum compound 14a**


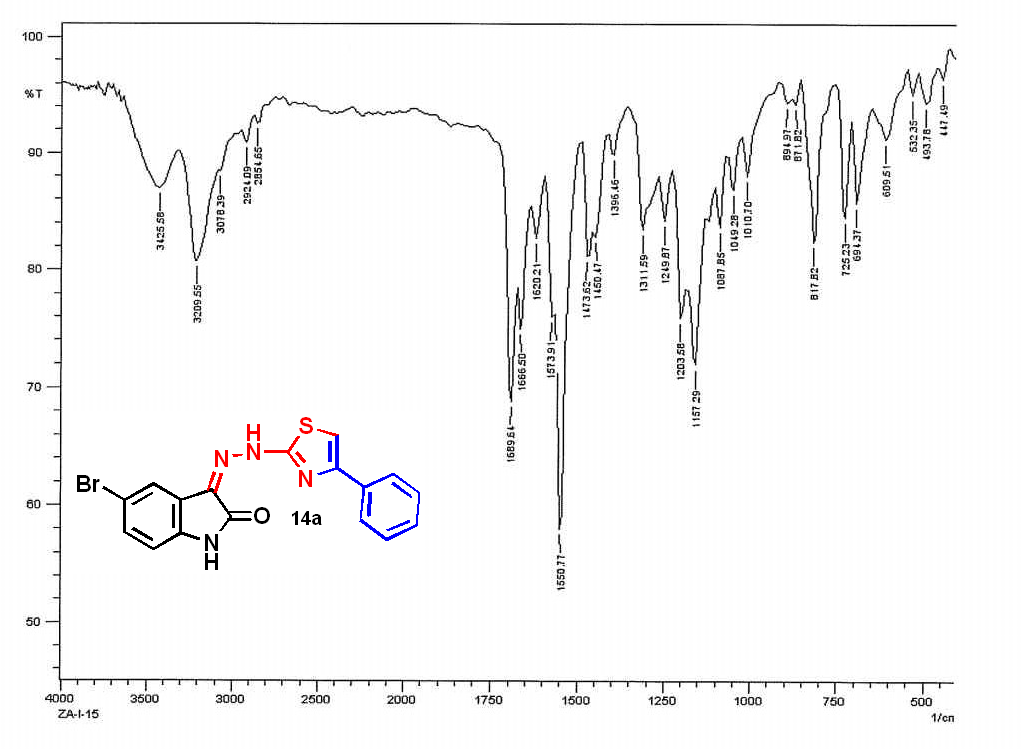


**IR spectrum compound 14a**


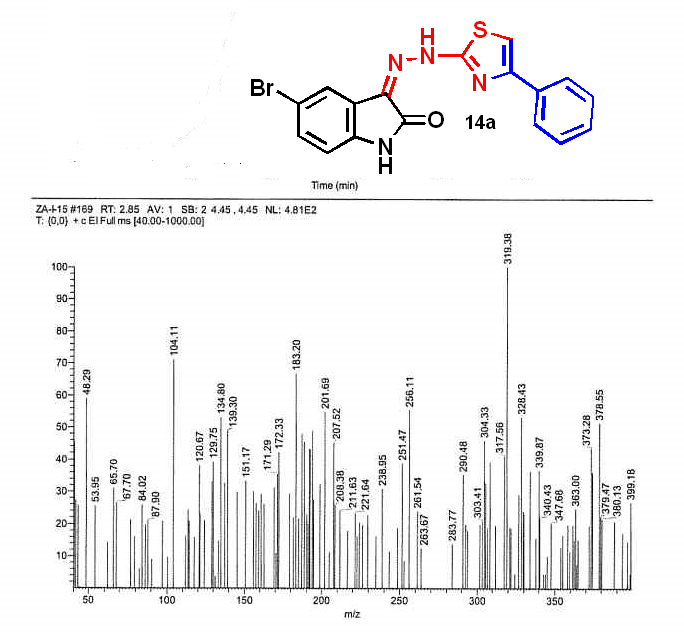


**Mass spectrum compound 14a**


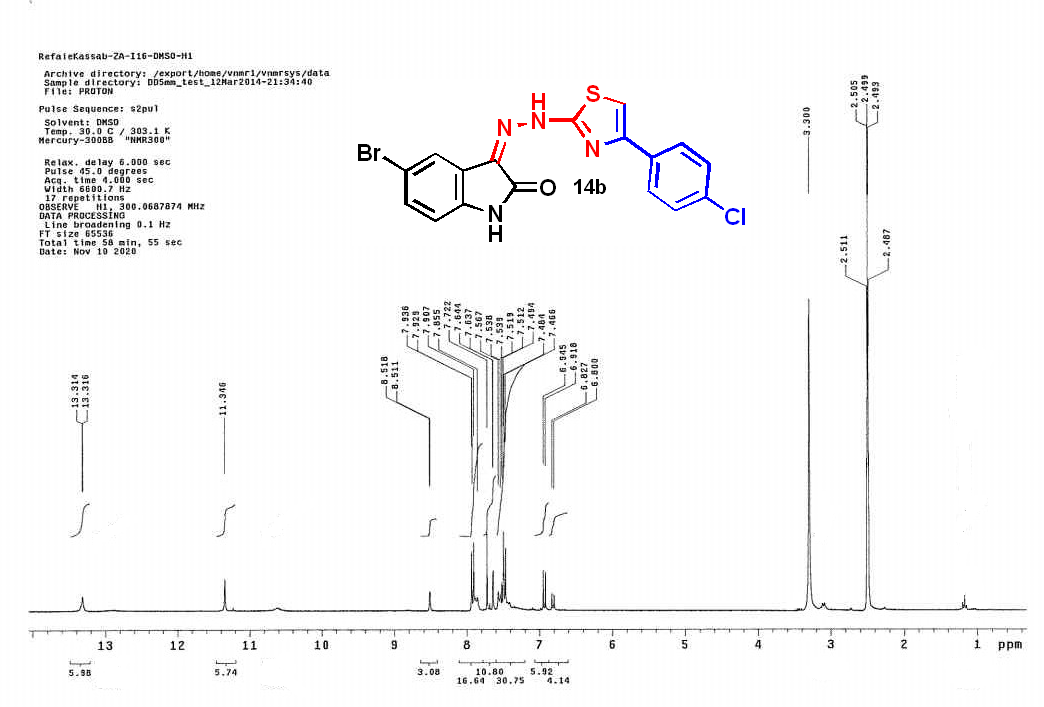


**1H NMR spectrum compound 14b**


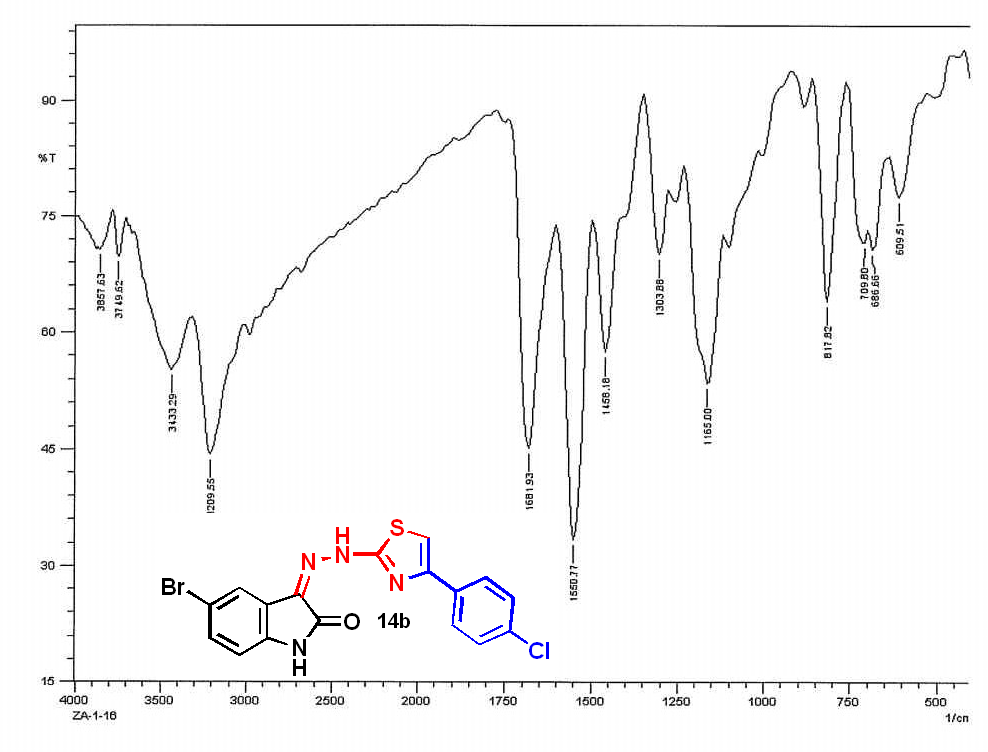


**IR spectrum compound 14b**


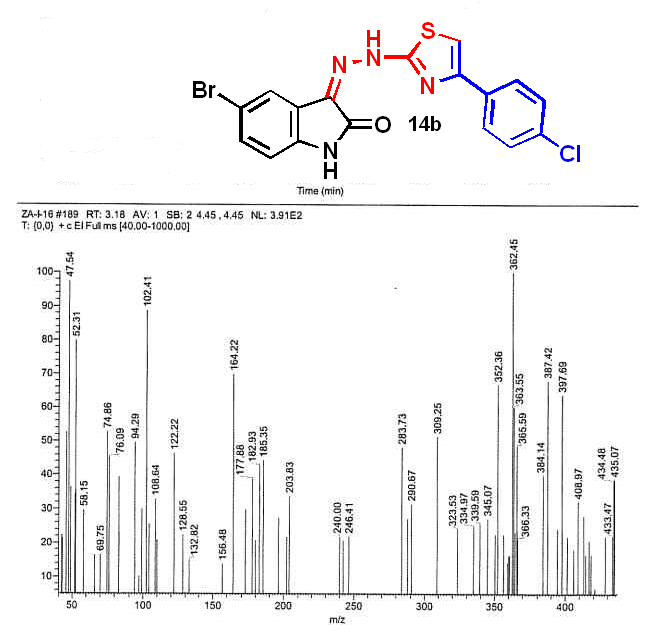


**Mass spectrum compound 14b**


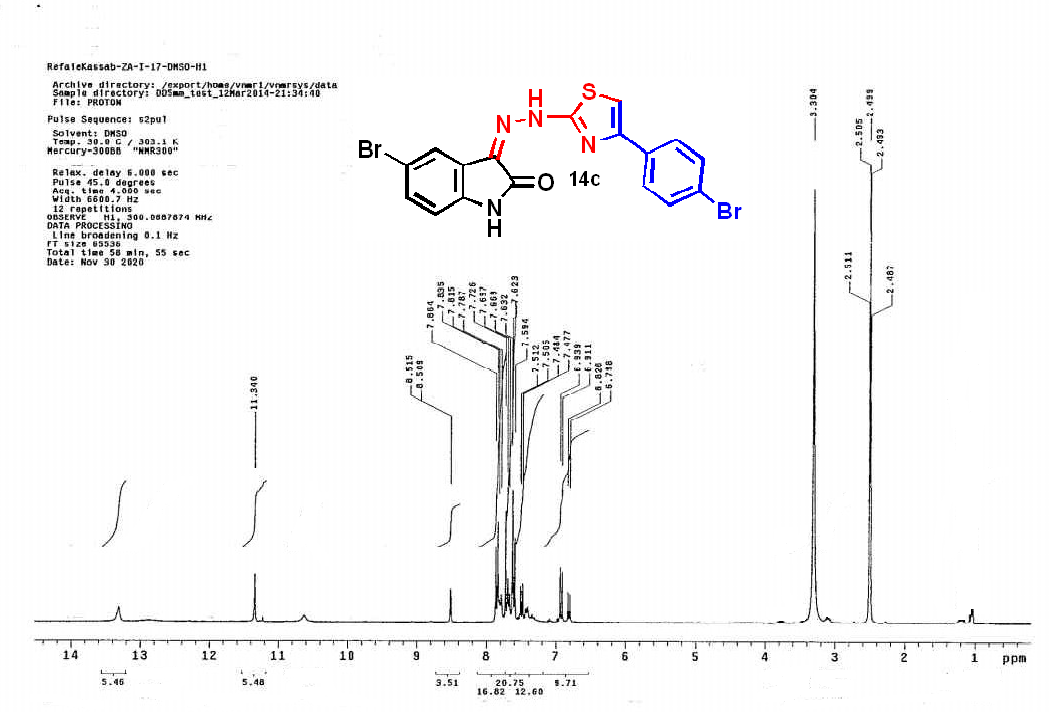


**1H NMR spectrum compound 14c**


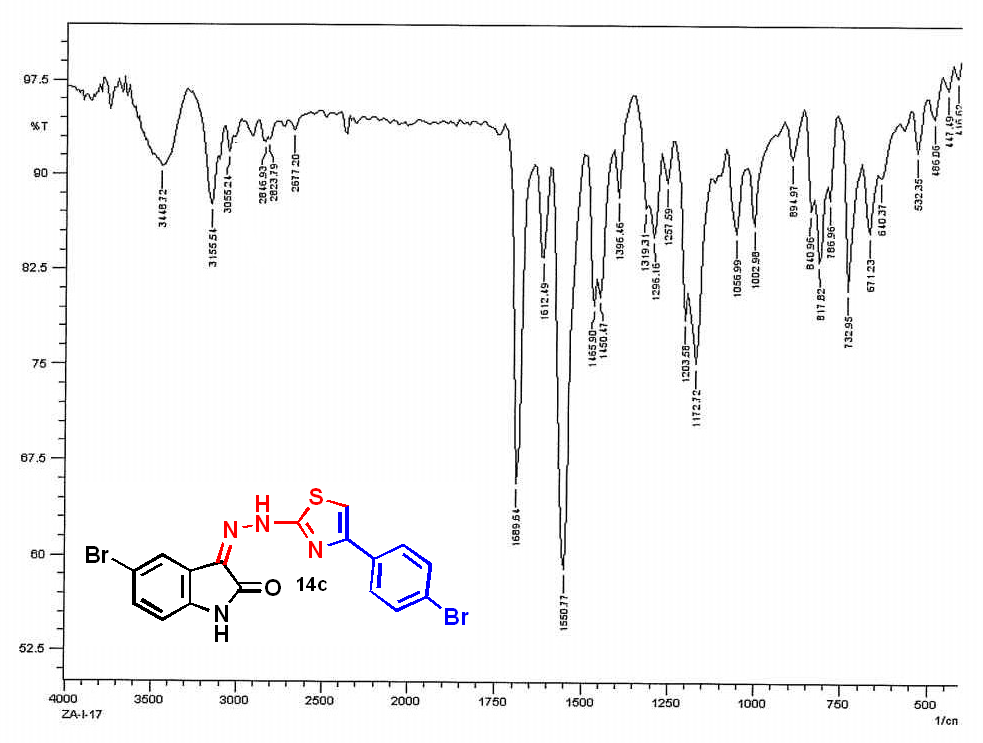


**IR spectrum compound 14c**


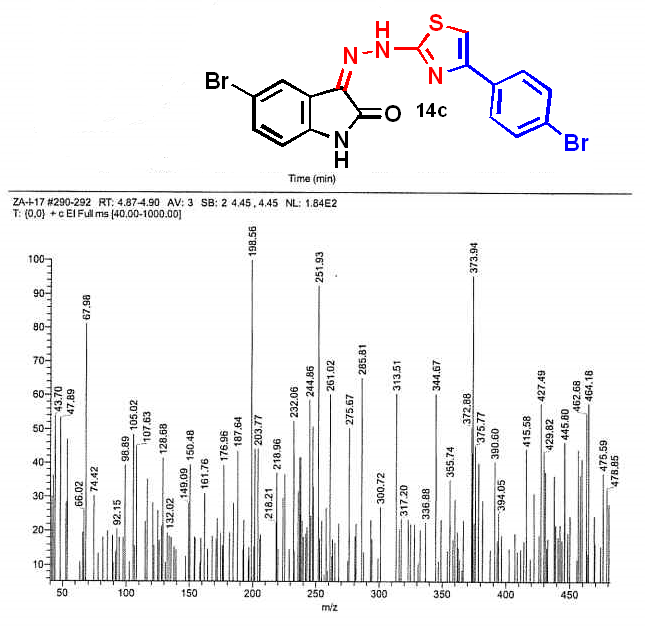


**Mass spectrum compound 14c**


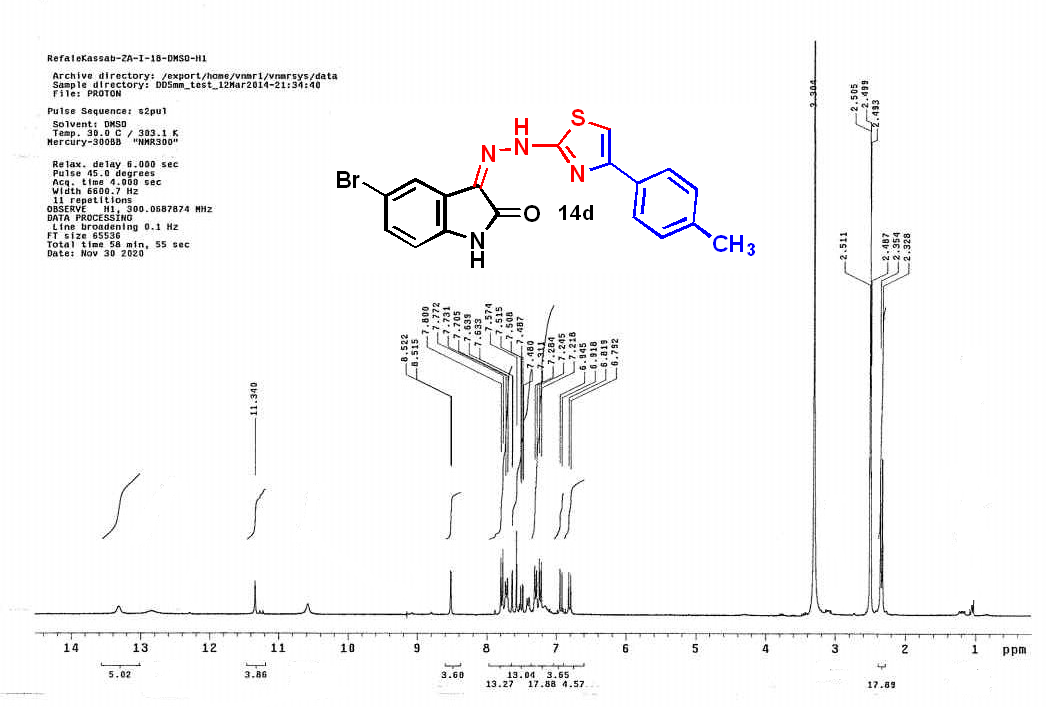


**1H NMR spectrum compound 14d**


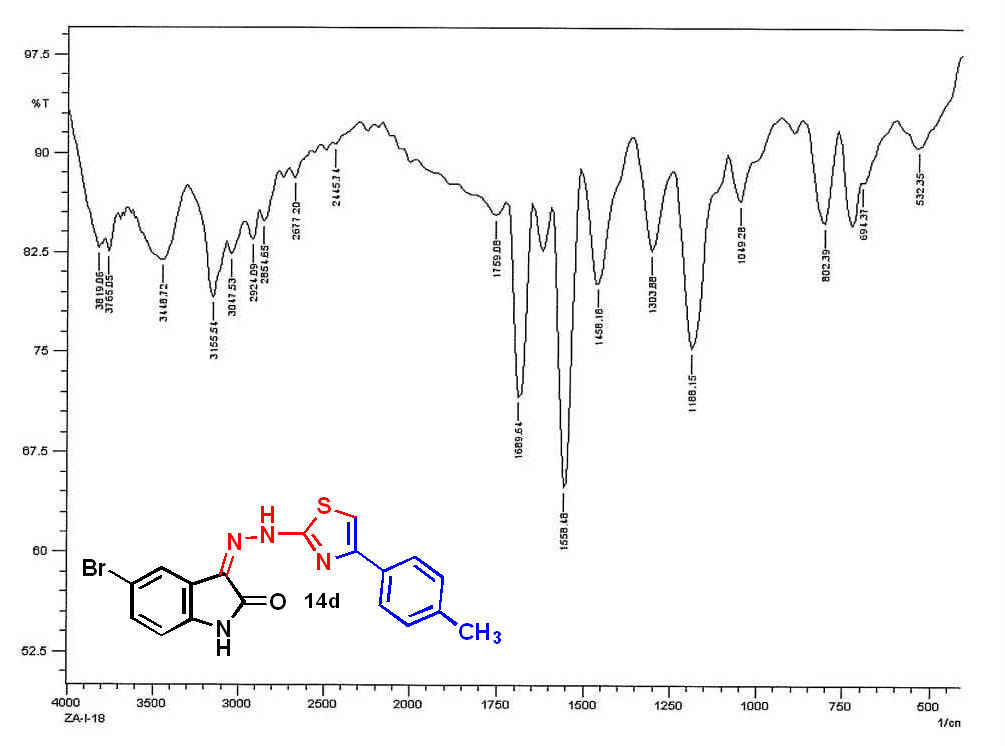


**IR spectrum compound 14d**


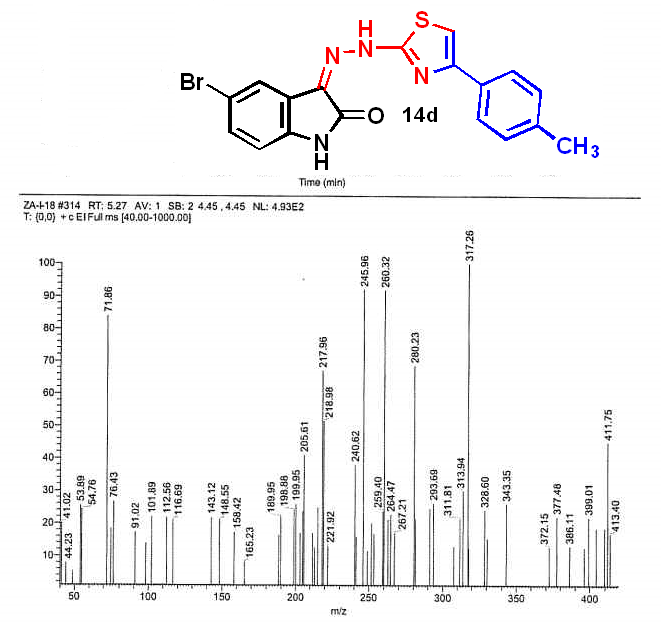


**Mass spectrum compound 14d**


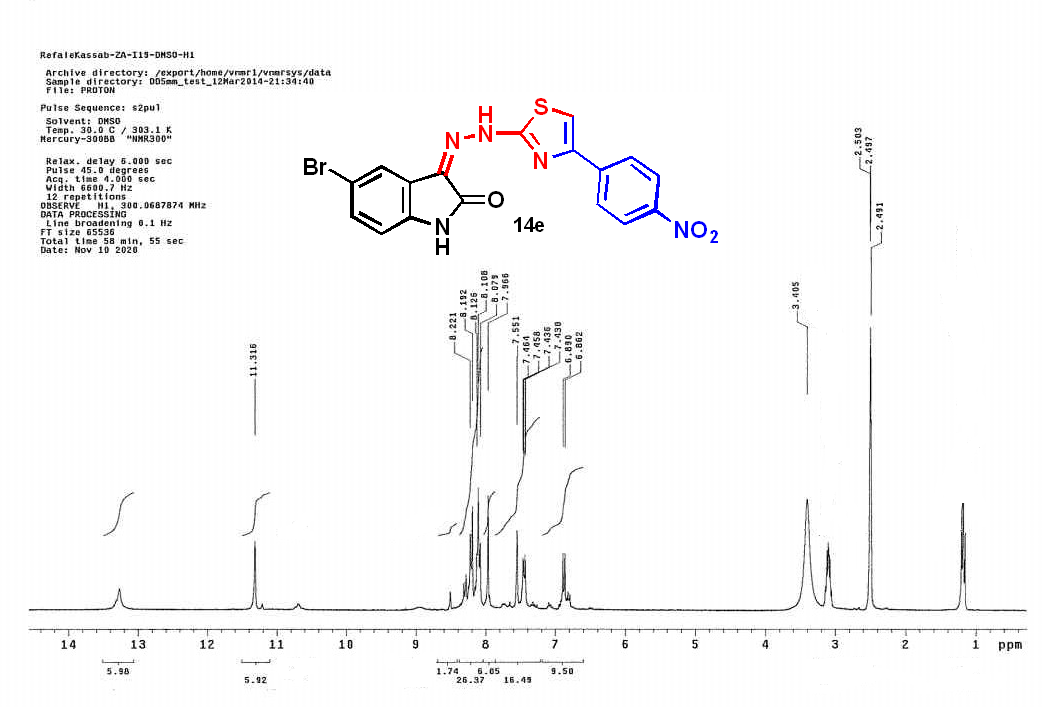


**1H NMR spectrum compound 14e**


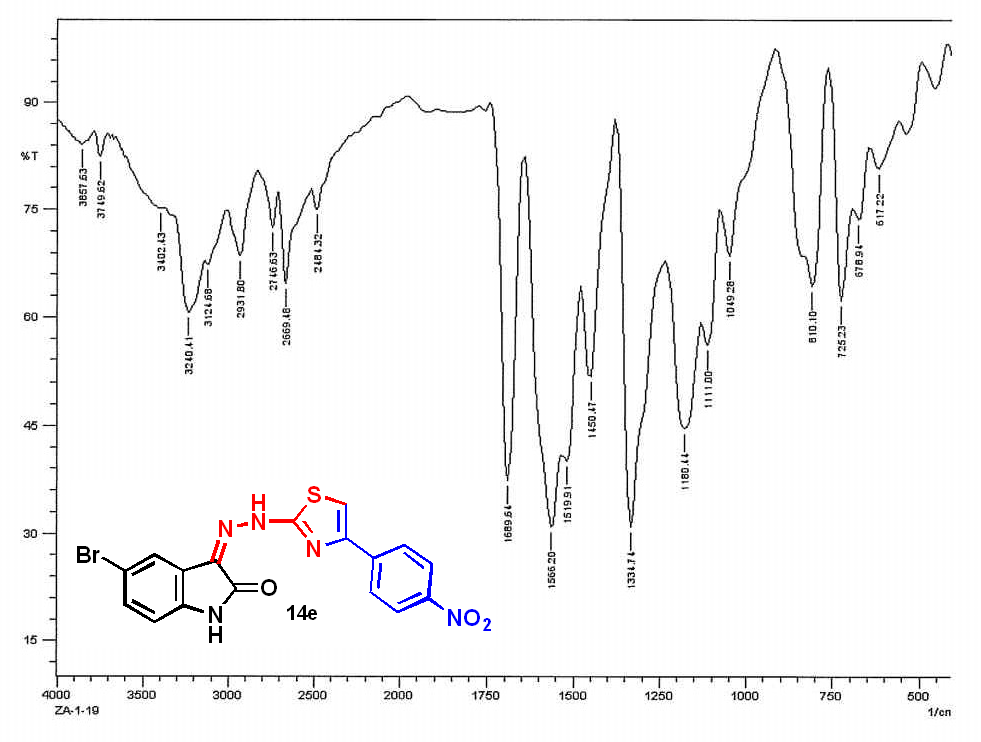


**IR spectrum compound 14e**


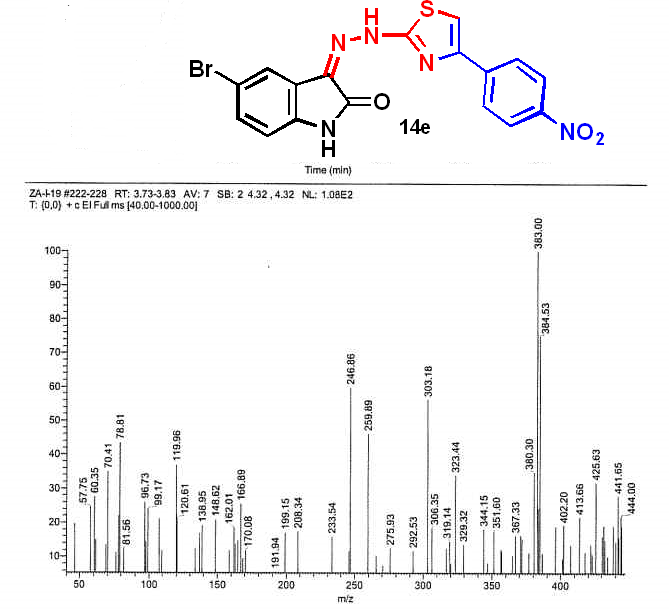


**Mass spectrum compound 14e**
